# Mechanism of barotaxis in marine zooplankton

Luis Alberto Bezares Calderón<sup>1,\*</sup>, Réza Shahidi<sup>1,2</sup> and Gáspár Jékely<sup>1,3,\*</sup>

<sup>1</sup>Living Systems Institute, University of Exeter, Stocker road, Exeter, EX4

<sup>2</sup>Electron Microscopy Core Facility (EMCF), University of Heidelberg, 69120 Heidelberg, Germany

<sup>3</sup>Centre for Organismal Studies (COS), University of Heidelberg, 69120 Heidelberg, Germany

\*Correspondence : l.a.bezares-calderon @ exeter.ac.uk, gaspar.jekely @ cos.uni-heidelberg.de

## Abstract

Hydrostatic pressure is a dominant environmental cue for vertically migrating marine organisms but the physiological mechanisms of responding to pressure changes remain unclear. Here we uncovered the cellular and circuit bases of a barokinetic response in the planktonic larva of the marine annelid *Platynereis dumerilii*. Increases in pressure induced a rapid, graded and adapting upward swimming response due to faster ciliary beating. By calcium imaging, we found that brain ciliary photoreceptors showed a graded response to pressure changes. The photoreceptors in animals mutant for *ciliary opsin-1* had a smaller ciliary compartment and mutant larvae showed diminished pressure responses. The ciliary photoreceptors synaptically connect to the head multiciliary band that propels swimming via serotonergic motoneurons. Genetic inhibition of the serotonergic cells blocked pressure-dependent increases in ciliary beating. We conclude that ciliary photoreceptors function as pressure sensors and activate ciliary beating through serotonergic signalling during barokinesis.

## Introduction

Hydrostatic pressure increases linearly with depth in the ocean and can provide planktonic organisms with information about depth independent of light or the time of the day (Blaxter 1978). Many marine invertebrate animals have long been known to sense and respond to changes in pressure (Rice 1964; Knight-Jones and Qasim 1955). The response generally consists of an increase in locomotion (barokinesis) upon an increase in pressure. Such responses could help planktonic animals retain their depth either in combination with, or independent of light cues (Forward, Wellins, and Buswell 1989). Changes in hydrostatic pressure may additionally entrain tidal rhythms in marine animals (Morgan 1965; Akiyama 2004; Naylor and Williams 1984).

Early studies on the barokinetic response in zooplankton have not revealed if the animals respond to relative or absolute changes in pressure. The kinematics and neuronal mechanisms of pressure responses have also not been characterized in detail for any planktonic animals. The most familiar structures for sensing changes in hydrostatic pressure are gas-filled compressible vesicles such as the swim bladder in fish (Qutob 1963). However, barokinetic responses are seen across many animals without any identifiable gas-filled vesicles. What structures could mediate pressure sensing in these organisms? Thus far, only a few alternative structures have been proposed for pressure sensation. In the statocyst of the adult crab *Carcinus maenas*, millimeter-sized thread-hairs may act as a syringe plunger to sense pressure (Peter J. Fraser and Macdonald 1994). In dogfish, which lack a swim bladder, hair cells in the vestibular organ have been proposed to act as pressure detectors (Peter J. Fraser and Sheldermine 2002). It is unknown which, if any, of these two vastly different pressure sensing mechanisms—one based on volume changes in a gas-filled vesicle and the other on deformation of sensory cilia—is used by the much smaller planktonic animals.

To understand the behavioural and neuronal mechanisms of pressure responses in marine zooplankton, we studied the planktonic ciliated larvae of the marine annelid *Platynereis dumerilii* (Özpolat et al. 2021). This larva uses ciliary beating to swim up and down in the water column to eventually settle on sea grass beds near coastal regions (Gambi et al. 1992). The sensory and neuronal bases of light-guided (Gühmann et al. 2015; Randel et al. 2014; Verasztó et al. 2018) and mechanically-driven behaviours (Luis A. Bezares-Calderón et al. 2018) in *Platynereis* larvae have been dissected due to the experimental tractability of this system. Its small size has allowed the entire reconstruction of the cellular and synaptic wiring map of the three-day-old larva (Verasztó et al. 2020; Jasek et al. 2022). Here we study *Platynereis* larvae to understand the cellular and neuronal bases of pressure sensation in zooplankton.

## Results

### *Platynereis* larvae respond to changes in hydrostatic pressure

To determine whether *Platynereis* larvae respond to changes in hydrostatic pressure, we developed a custom behavioural chamber with precise pressure control. We subjected larvae to step changes in pressure and recorded their behaviour under near-infrared illumination (Figure 1A; see Materials and Methods). We used hydrocarbon-free compressed air to increase pressure in the chamber. We tested a range of pressure levels in randomized order from 3 mbar to 1000 mbar (1 mbar equals to 1 cm water depth) (Figure 1—figure supplement 1A). We focused on one- to three-day-old larvae corresponding to the early and late trochophore and nectochaete stages. We used batches of > 100 larvae for each experiment. Both two-day-old and three-day-old larvae respond to pressure increase by swimming upwards faster and in straighter trajectories, as quantified by changes in average vertical displacement, swimming speed, the ratio of upward to downward trajectories (Figure 1B–C, Figure 1—figure supplement 1B–D; Video 1), and a straightness index (the net over total distance) (Figure 1—figure supplement 1E).

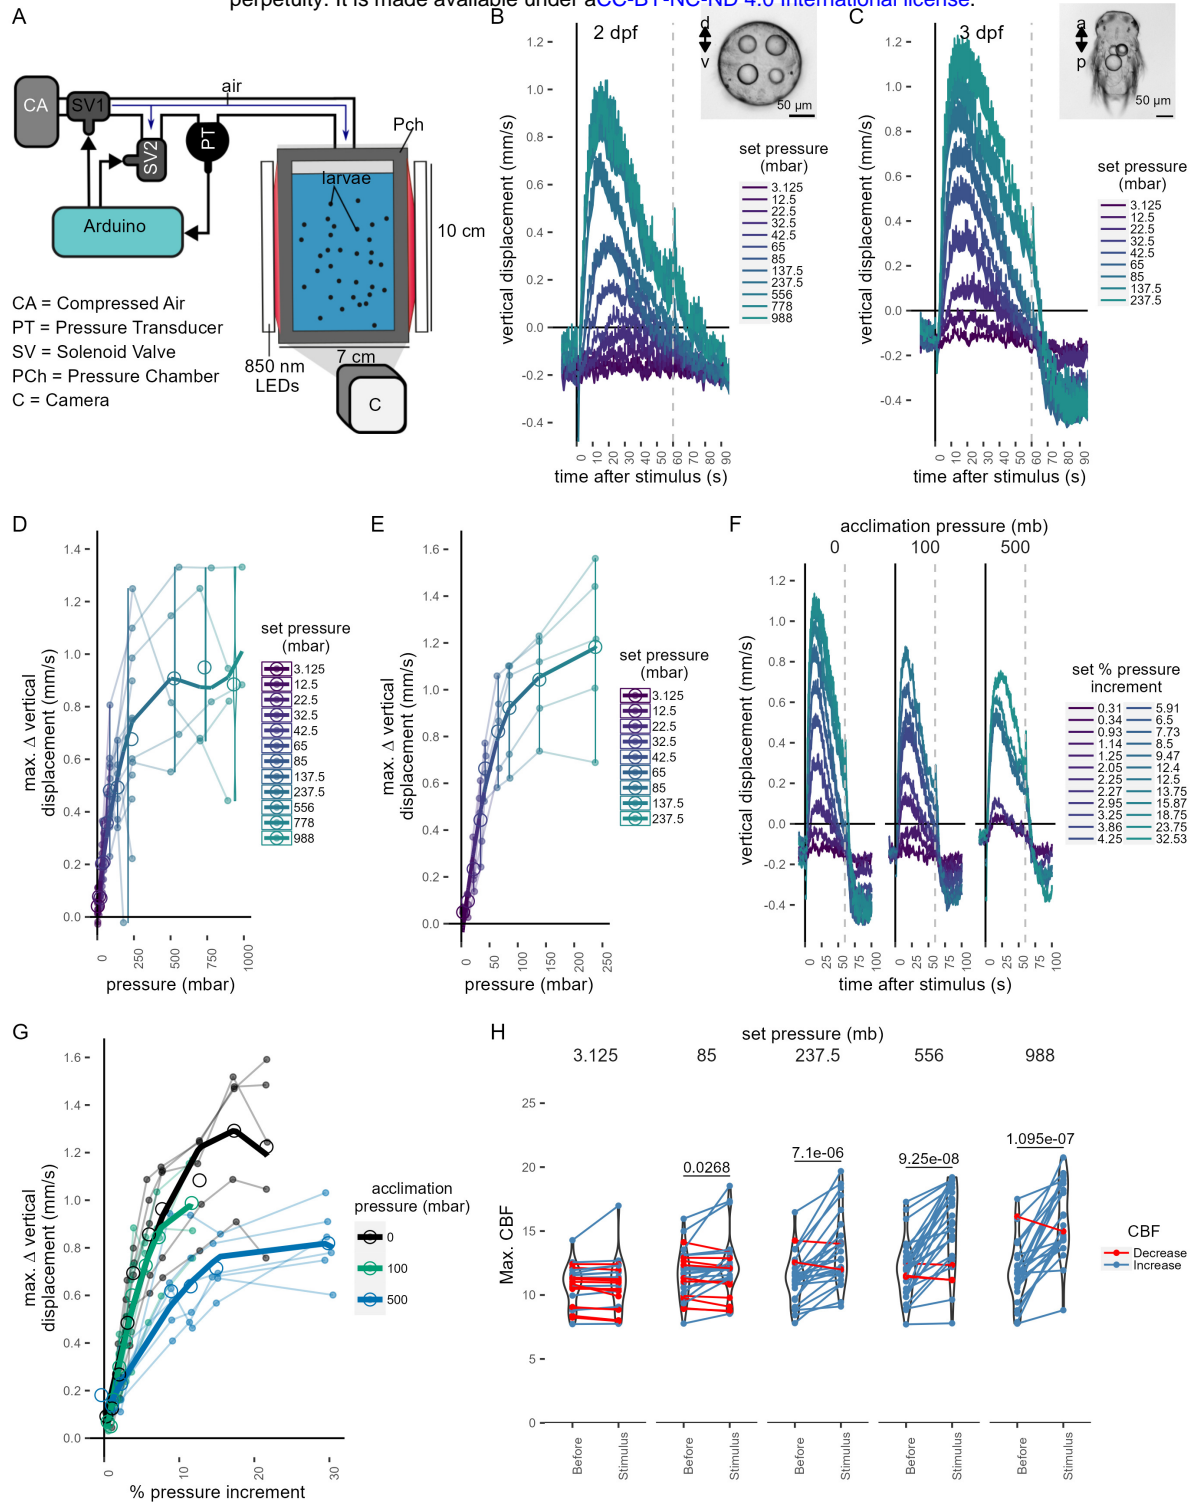

**Figure 1.** Pressure response in *Platynereis* larvae. (A) Schematic of the behavioural setup used to stimulate larvae with controlled pressure levels. (B-C) Vertical displacement of (B) two-day-old and (C) three-day-old larvae (insets) as a function of time relative to different step increases in pressure. Dashed line at 60 s indicates the end of stimulation. Each data point is the average of 2 to 12 (B), or 4 to 5 (C) batches of larvae. (D-E) Maximum increase in relative vertical displacement of (D) two-day-old and (E) three-day-old larvae for each pressure level tested. Small filled circles represent individual data points, data points from the same batch are joined by lines. Larger open circles indicate the mean across all batches. (F) Vertical displacement of three-day-old larvae acclimated for ca. 10 min to either ambient pressure (0 mb, left), 100 mb (centre), or 500 mb (right) prior to the experiment. Lines are coloured by set fractional increments in pressure. (G) Maximum increase in relative vertical displacement of three-day-old larvae acclimated to 0 mb, 100 mb or 500 mb. The data are fitted with a saturation curve. 5 (0, 100 mb) or 6 (500 mb) batches tested in F—G. (H) Maximum ciliary beat frequency (CBF) that single larvae reached in the 30 s prior (category *Before*), or during the first 30 s (*Stimulus*) of the indicated increase in pressure. N = 18-22 larvae. Data points for the same larva are joined by lines. One-tailed paired t-test with Bonferroni correction testing for an increase in CBF; p-values < 0.05 are shown. Data in D, E and G were fitted with a 3<sup>rd</sup> (D, E) or a 2<sup>nd</sup> (G) order polynomial function. Figure 1—source data 1 (A,D), Figure 1—source data 2 (C,E), Figure 1—source data 3 (F-G), Figure 1—source data 4 (H).

We used the maximal vertical displacement value (normalised to the mean displacement per trial prior to stimulus presentation) to compare the magnitude of responses as a function of pressure change. In both two- and three-day-old larvae the responses were graded: higher pressure levels led to higher maximal vertical displacement (Figure 1D–E). Three-day-old larvae had a slightly lower sensitivity threshold (10–20 mbar) than two-day-old larvae (20–30 mbar) and their response plateaued at lower pressure levels than that of two-day-old larvae (Figure 1B–E). One-day-old larvae did not show a detectable response to even the largest pressure levels tested (Figure 1—figure supplement 2A–B). The straightness of trajectories also increased with increasing pressure changes. This was due to narrower helical swimming paths under pressure, visible in close-up videos (Video 2 & Video 3). Three-day-old larvae also showed a diving response upon the release of pressure (Figure 1B–C, F; Figure 1—figure supplement 1C–D). Two-day-old larvae stopped moving upwards when the stimulus ended, but did not show an active diving response to pressure

OFF. To exclude the possibility that either the changes in the partial pressure of gases due to the use of compressed air, or the mechanical wave associated to the inflow of air was causing the upward swimming behaviour, we also used a static column of water of different heights to change pressure levels (Figure 1—figure supplement 2C). We observed the same dependence of vertical displacement on the magnitude of pressure change in this setup (Figure 1—figure supplement 2D-E). Overall, our experiments uncovered a graded, saturable and highly sensitive upward swimming ON response to increased pressure in *Platynereis* larvae and a diving OFF response (in three-day-old larvae only).

## *Platynereis* larvae respond to relative changes of pressure

Larvae may either detect absolute pressure levels, relative changes, or the rate at which pressure changes (Morgan 1984). To differentiate between these possibilities, we first exposed larvae to linear increases of pressure with rates between 0.05 mbar s<sup>-1</sup> and 2.6 mbar s<sup>-1</sup> (Figure 1—figure supplement 3A). We used a 2<sup>nd</sup>-degree polynomial function for rate categories 0.3-0.7 mbar s<sup>-1</sup> (ANOVA,  $p = 6.5e-3$ ) and 0.9-1.3 mbar s<sup>-1</sup> (ANOVA,  $p = 5.8e-8$ ), as it described the relationship between vertical displacement and pressure more accurately than a simple linear model. The difference between a linear and a 2<sup>nd</sup>-degree polynomial fit was not significant for rates > 1.3 mbar s<sup>-1</sup> (ANOVA,  $p \sim 0.1$ ). These results suggest that larvae compensate for the increase in pressure by a corresponding increase in upward swimming when rates of pressure increase are sufficiently high.

The linear response to a gradual increase in pressure suggests that larvae detect changes in pressure, rather than absolute pressure levels. To directly address this, we acclimated three-day-old larvae for ca. 10 min to either 100 mbar or 500 mbar pressure above the atmospheric level. We then tested a range of randomized step-increases in pressure levels (Figure 1—figure supplement 3D). After the acclimation period, the distribution of larvae exposed to 100 mbar or 500 mbar was not different from the larvae kept at ambient levels (two-sided Kolmogorov Smirnov test, 0–100 mbar:  $p = 0.915$ , 0–500 mbar:  $p = 0.0863$ ) (Figure 1—figure supplement 3E–F). Upon step increase, larvae reacted with graded upward swimming even if they were pre-exposed to 100 or 500 mbar (Figure 1F). The sensitivity decreased when larvae were acclimated to 500 mbar (Figure 1G). When pressure was released at the end of the increase trials, larvae pre-exposed to 500 mbar showed a downward displacement followed by an upward displacement as soon as pressure was increased back to the corresponding basal level (Figure 1—figure supplement 3G). The downward displacement resembled the magnitude of the diving response we observed for 3-day-old larvae (Figure 1—figure supplement 3H).

Our experiments suggest that *Platynereis* larvae react to relative increases in pressure in a graded manner proportional to the magnitude of the increase. The response is adaptable and occurs at very different basal pressures (0 mbar or 500 mbar—corresponding to 5 m of water depth). This hints at a pressure-gauge mechanism to regulate swimming depth by compensating for vertical movements due to sinking (when cilia are arrested (Verasztó et al. 2017)), downward swimming (e.g., during UV-avoidance (Verasztó et al. 2018)) or down-welling currents (Genin et al. 2005).

## Ciliary beat frequency increases with pressure

To understand the mechanism by which larvae regulate swimming in response to an increase in pressure, we analysed the effect of pressure on ciliary beating in the prototroch—the main ciliary band that two-day-old and three-day-old *Platynereis* larvae use to swim. Individual two-day-old larvae were tethered to a glass cuvette from the posterior end with a non-toxic glue previously used in *Platynereis* larvae (Luis A. Bezares-Calderón et al. 2018). The cuvette was inserted into a custom-made pressure vessel placed under a microscope. We recorded ciliary beating in effective darkness (Figure 1—figure supplement 4A). Step increases in pressure were applied for 60 sec in a randomized manner to levels comparable to those used in batch experiments (Figure 1—figure supplement 4B).

The mean ciliary beat frequency increased as soon as the step change in pressure was applied, with larger step changes showing more noticeable increases in beat frequency (Figure 1—figure supplement 4C, Video 4). The maximum ciliary beat frequency (max. CBF) during the stimulus period showed a statistically significant increase for all but the lowest pressure steps tested relative to the period before the onset of the stimulus (85 mb  $p = 0.046$ , 237.5 mb  $p = 2.08 E-05$ , 556 mb  $p = 8.35 E-07$ , 988 mb  $p = 7.8 E-07$ ; one-tailed paired t-test with Bonferroni correction testing for an increase in CBF; Figure 1H). The related relative measure of maximum percent change (max.  $\Delta\%$ CBF) also showed an increase under pressure (Figure 1—figure supplement 4D). Overall, these data suggest that rapid upward swimming under pressure is due to an increase in the beating frequency of prototroch cilia that is proportional to the change in pressure.

## Brain ciliary photoreceptor cells show graded activation under increased pressure

To identify the pressure-sensitive cells in *Platynereis* larvae, we developed an approach to couple imaging of neuronal activity with pressure increases (Figure 2A). We injected fertilised eggs with mRNA encoding the calcium indicator GCaMP6s (Chen et al. 2013)—an indirect reporter of neuronal activity—and embedded injected larvae in low-melting agarose. Mounted larvae were introduced into a custom-built microscopy chamber, where pressure could be increased using compressed air. To provide morphological landmarks and to correct for Z-shifts during imaging, we co-injected larvae with an mRNA encoding the membrane-tagged reporter palmitoylated tdTomato.

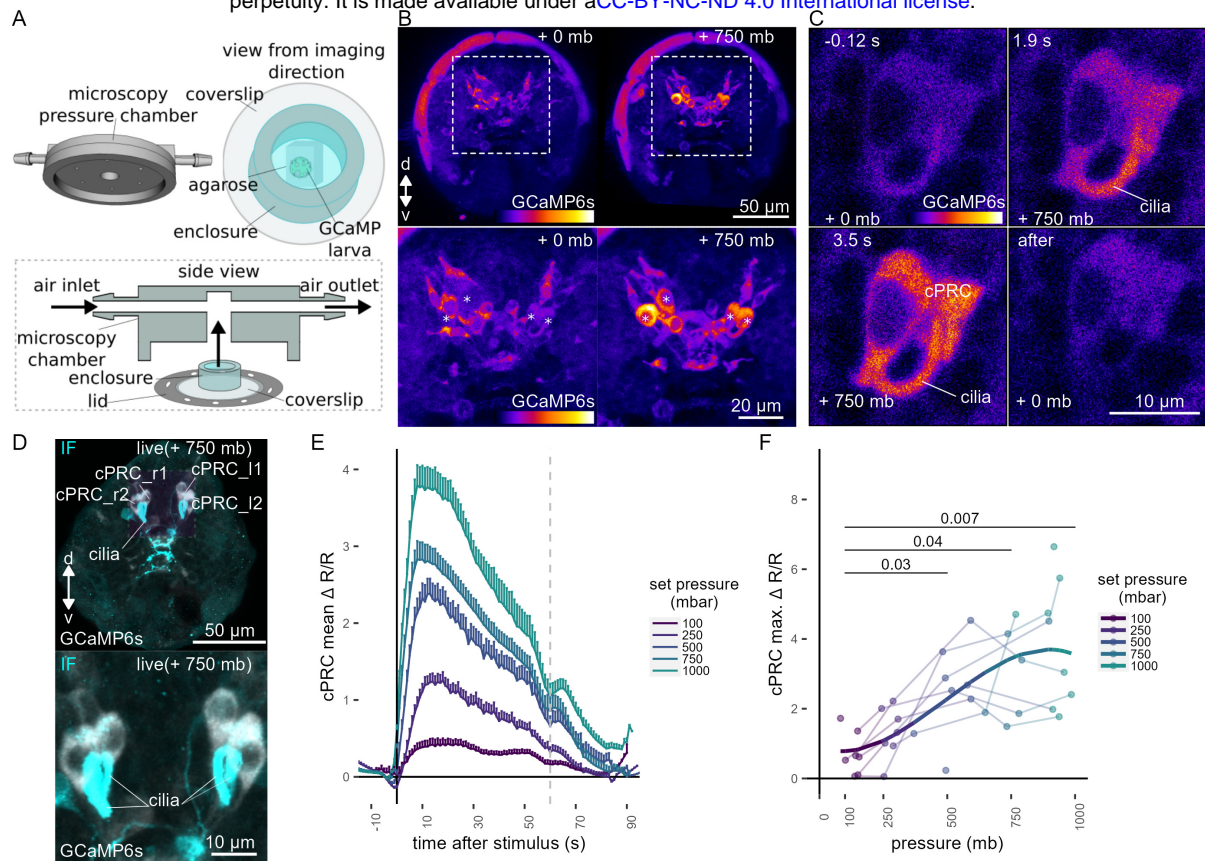

**Figure 2.**  $\text{Ca}^{2+}$  imaging of *Platynereis* larvae during pressure increases. (A)  $\text{Ca}^{2+}$  imaging preparation to analyse neuronal activation upon pressure stimulation. Left: side view of the 3D model of the microscopy pressure chamber. Right: Larvae embedded in agarose are placed on a round coverslip. An enclosure around the embedded larva serves to keep it under water. Bottom: the enclosed larva on the coverslip is inserted in the central hole of the chamber. A screwable lid secures the coverslip to the chamber and prevents air leaks. Pressure is increased with compressed air entering from one of the inlets. (B, top) Maximum intensity projection of a two-day-old larva injected with *GCaMP6s* mRNA acquired before (left) or during (right) the pressure stimulus. (B, bottom) Enlarged views of the corresponding regions highlighted with dashed squares in the top panels. Asterisks mark the position of cell nuclei of the four cells activated by pressure. (C) Still images of a cPRC acquired at different time points relative to increase in pressure ( $t = 0$ , Video 5). The time points are indicated on the upper left of each panel. Pressure level is also indicated. (D) Max. intensity projection of a *GCaMP6s* Z-stack during raised pressure (white channel) and of a Z-stack of the same larva after immunofluorescence (IF) with NIT-GC2, a marker for cPRC cilia, and for serotonin (cyan channel). Anterior view in B–D. (E) Mean  $\Delta R/R$  in cPRC\_I1 across different step increases in pressure as a function of time of stimulation. Dashed line at 60 s marks the end of stimulus.  $N = 8$  larvae. (F) Max.  $\Delta R/R$  in cPRC\_I1 as a function of pressure level. Data points from the same larva are joined by lines. Regression line fitting the data is also shown. One-tailed unpaired t-test with Bonferroni correction testing for an increase in Max.  $\Delta R/R$  with pressure.  $p$ -values  $< 0.05$  are shown. Figure 2—source data 1 (E-F).

By imaging the entire larva before and during the pressure stimulus, we found a group of four cells on the dorsal side of the brain that showed consistent increases in *GCaMP6s* fluorescence when pressure increased (Figure 2B; Figure 2—figure supplement 1). Time-lapse recordings of these cells revealed that they had prominent cilia, which become visible by the increase in *GCaMP6s* signal during pressure increase (Figure 2C, Figure 2—Supplement Video 1). The position, number, size and morphology of these cells closely matched to that of the previously described brain ciliary photoreceptor cells (cPRCs) (Arendt et al. 2004; Tsukamoto et al. 2017; Veraszto et al. 2018). Immunostaining of the same larvae that were used for  $\text{Ca}^{2+}$  imaging with an antibody raised against NIT-GC2, a marker of cPRC cilia (Jokura et al. 2023), followed by image registration directly confirmed that the four cells activated under pressure were the cPRCs (Figure 2D).

To characterise the response of cPRCs to pressure, we applied a randomised set of pressure increases (Figure 2—figure supplement 2A) to two-day-old larvae injected with *GCaMP6s* mRNA while recording fluorescence changes in the four cPRCs. All four cPRCs responded to the pressure levels tested (Figure 2E; Figure 2—figure supplement 2B–C). This response—like that observed at the behavioural level—was graded and increased proportionally to the pressure change (Figure 2E–2F; Figure 2—figure supplement 2B–C, 2E). The difference in the response between pressure levels was statistically significant for some of the cPRCs (Figure 2F; Figure 2—figure supplement 2C). The calcium signal also decreased rapidly after stimulus onset. Therefore, cPRCs may be able to directly encode the intensity of the stimulation in their activity, reflected in their internal  $\text{Ca}^{2+}$  levels, and adapt to pressure levels. The unique sensory morphology and pressure-induced  $\text{Ca}^{2+}$  dynamics make the cPRCs candidate pressure receptors.

An additional unpaired sensory cell on the dorsal side was also activated in some of the trials (Figure 2—figure supplement 1, green asterisk). We refer to this cell here as  $\text{SN}^{\text{d1\_unp}}$  (by position and morphology it corresponds to the neurosecretory cell  $\text{SN}^{\text{YFa+}}$  (Williams et al. 2017)). At 750 mb, this cell responded by a transient but robust increase at stimulation onset, but  $\Delta R/R$  dropped to basal values before the end of the stimulus, unlike the cPRC response (Figure 2—figure supplement 2D).  $\text{SN}^{\text{d1\_unp}}$  ( $\text{SN}^{\text{YFa+}}$ ) may also contribute to the pressure response, although it is less sensitive than cPRCs and has very few synapses (Williams et al. 2017).

Another indirect observation that is consistent with cPRCs being the primary pressure receptors is that one-day-old larvae that lack differentiated cPRCs (Fischer, Henrich, and Arendt 2010) do not respond to pressure (Figure 1—figure supplement 2A).

## *c-opsin-1* mutants have a reduced pressure response

cPRCs express ciliary-opsin-1 (*c-ops-1*), which forms a UV-absorbing photopigment (Arendt et al. 2004; Tsukamoto et al. 2017; Veraszto et al. 2018). Knocking out the *c-ops-1* gene abolishes a UV-avoidance response in *Platynereis* larvae (Veraszto et al. 2018). As cPRCs respond to pressure increases, we tested whether *c-ops-1* knockout mutants (*c-ops-1* $^{\Delta 8/\Delta 8}$ ) also showed a defect in the pressure response.

A range of step increases in pressure were applied to single batches of either wild-type (WT) or *c-ops-1 $\Delta\delta/\Delta\delta$*  three-day-old larvae (Figure 3—figure supplement 1A). The assays were carried out in a smaller pressure vessel (height: ~4 cm), to allow consistent imaging of the fewer mutant larvae available. The swimming speed of *c-ops-1 $\Delta\delta/\Delta\delta$*  mutant larvae was not significantly different from WT larvae ( $p = 0.118$ , unpaired Wilcoxon test for lower speed in mutants; Figure 3—figure supplement 1B). *c-ops-1 $\Delta\delta/\Delta\delta$*  larvae responded in a graded manner to increases in pressure by upward swimming (Figure 3A; Figure 3—figure supplement 1C). However, their response was weaker than the response of age-matched WT larvae (Figure 3—figure supplement 1C). An ANOVA comparison showed that a model considering the genotype better explained the data than a model without this variable, for either a simple or a polynomial linear regression model ( $p$ -values =  $9.98 \times 10^{-7}$  and  $9.92 \times 10^{-6}$ , respectively). Ciliary beating prior to pressure increase was not significantly different between *c-ops-1 $\Delta\delta/\Delta\delta$*  and WT larvae ( $p = 0.835$ , unpaired Wilcoxon test for lower CBF in mutants; Figure 3—figure supplement 1D). Upon pressure increases, CBF in *c-ops-1 $\Delta\delta/\Delta\delta$*  larvae showed a significant increase to the three highest pressure levels tested (237.5 mb  $p = 0.014$ , 556 mb  $p = 9.7 \times 10^{-5}$ , 988 mb  $p = 6.35 \times 10^{-5}$ ; one-tailed paired t-test with Bonferroni correction testing for an increase in CBF; Figure 3B). *c-ops-1 $\Delta\delta/\Delta\delta$*  larvae also showed significant increases in max.  $\Delta\%$ CBF as the pressure stimulus was increased (Figure 3—figure supplement 1E; compare to the WT data in Figure 3B), with no significant difference in the increase to WT larvae (Figure 3—figure supplement 1F). In summary, *c-ops-1 $\Delta\delta/\Delta\delta$*  larvae can still respond to changes in pressure in a graded manner, but the response is weaker than in WT larvae, both at the population and at the single-larva levels. This indicates that *c*-opsin-1 is not directly required for the pressure response, but its absence leads to a weakened response to pressure.

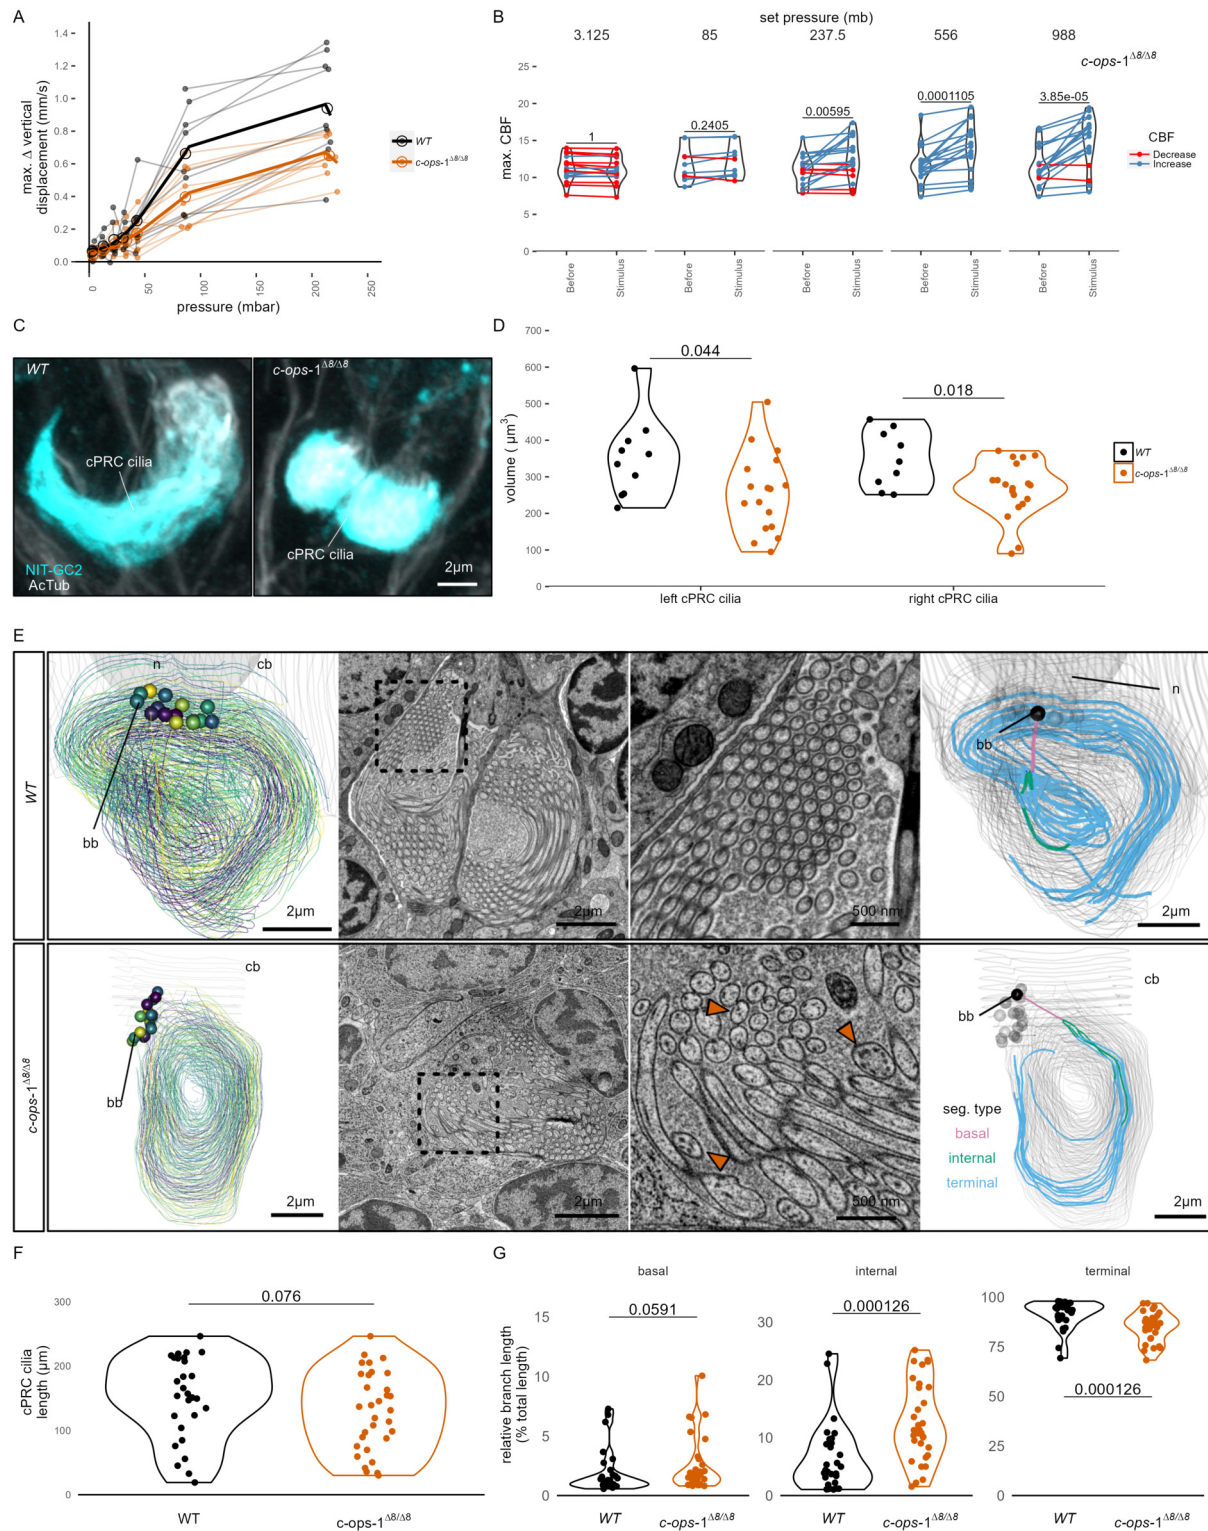

**Figure 3.** *c-ops-1 $\Delta\delta/\Delta\delta$*  larvae show a weaker response to pressure and have structural defects in cPRC cilia. (A) Maximum change in vertical displacement of WT and *c-ops-1 $\Delta\delta/\Delta\delta$*  three-day-old larvae for each pressure step-change tested. Data points from the same batch are joined by lines. Larger open circles indicate the mean value. Thicker solid lines show the regression model predictions.  $N = 7-9$  (*c-ops-1 $\Delta\delta/\Delta\delta$* ),  $N = 8-10$  (WT) batches. (B) Max. CBF that individual *c-ops-1 $\Delta\delta/\Delta\delta$*  larvae reached in the 30 s prior (Before), or during the first 30 s of the indicated increase in

bioRxiv preprint doi: <https://doi.org/10.1101/2023.02.28.530398>; this version posted November 7, 2023. The copyright holder for this preprint (which was not certified by peer review) is the author/funder, who has granted bioRxiv a license to display the preprint in perpetuity. It is made available under aCC-BY-NC-ND 4.0 International license.

pressure (*Stimulus*). Data points for the same larva are joined by lines. One-tailed paired t-test with Bonferroni correction testing for an increase in CBF; all p-values are shown. N = 10—17 larvae. (C-D) cPRC ciliary volume measured for each pair of cPRC cilia on the left and right body sides in two-day-old *WT* and *c-ops-1 $\Delta$ <sup>B/ $\Delta$ B</sup>* larvae. Volumes were measured using the signal of the cPRC cilia antibody ( $\alpha$ -cPRCcilia). (C) Maximum intensity projections of IF stainings used for quantifying cPRC ciliary volume. (D) cPRC ciliary volume distribution sorted by genotype and body side. One-tailed unpaired t-test with Bonferroni correction testing for a decrease in ciliary volume in mutant larvae. p-values < 0.05 are shown. N = 9—10 (*WT*), 17—19 (*c-ops-1 $\Delta$ <sup>B/ $\Delta$ B</sup>*) larvae. (E) Morphology of cPRC cilia in 3 day-old *WT* (top row) and *c-ops-1 $\Delta$ <sup>B/ $\Delta$ B</sup>* (bottom row) larvae reconstructed by serial EM. Reconstructions of cPRC cilia are shown in the left-most panels. A representative micrograph of the EM data used for the reconstructions is shown in the adjacent panels. Dashed squares in these images mark the regions shown in the enlarged views to the right. Orange arrowheads point to cilia with more than one microtubule doublets. In the right-most panels, the branches of single cPRC cilia are coloured by Strahler order (Str. order). Branches with higher Str. orders originate closer to the basal body (bb). The remaining cPRC cilia are coloured in grey. cb: cell body; n: nucleus; bb: basal body. Figure 3—source data 1 (A), Figure 1—source data 4 (B), Figure 3—source data 2 (D).

## *c-opsin-1* mutants have defects in cPRC cilia

The reduced response of *c-ops-1 $\Delta$ <sup>B/ $\Delta$ B</sup>* larvae to pressure may stem from morphological defects of the cPRC sensory cilia in these mutants. We used stainings with acetylated tubulin and NIT-GC2, an antibody specifically marking cPRC cilia (see Figure 2D) to measure the volume of the ciliary compartment in *WT* and *c-ops-1 $\Delta$ <sup>B/ $\Delta$ B</sup>* larvae (Figure 3C; Figure 3—figure supplement 1G). Volumetric imaging in two-day-old larvae stained with these antibodies revealed that the cPRC ciliary compartment in *c-ops-1 $\Delta$ <sup>B/ $\Delta$ B</sup>* larvae was significantly smaller than in age-matched *WT* larvae (p = 0.044 and 0.018 for left and right ciliary compartments, one-tailed unpaired t-test with Bonferroni correction; Figure 3D). In some cases, cPRC ciliary compartments were drastically reduced, albeit never completely absent in all four cells (Figure 3—figure supplement 1F). A reduced ciliary compartment may underlie the weaker responses of *c-ops-1 $\Delta$ <sup>B/ $\Delta$ B</sup>* larvae to pressure.

To further investigate the morphological defects of cPRC sensory cilia in *c-ops-1 $\Delta$ <sup>B/ $\Delta$ B</sup>* larvae, we reconstructed the cPRC ciliary structure of a mutant larva using volume electron microscopy. We compared this reconstruction to a volume EM dataset of cPRC cilia from a three-day-old *WT* larva previously reported (Verasztó et al. 2018). The two *WT* cPRCs reconstructed have 14 to 15 ramified cilia tightly wrapped on themselves (Figure 3E, top row, Video 6). Branching occurs close to the basal body, soon after cilia protrude from the cell body. Most branches inherit an individual microtubule doublet. The 15 to 17 cilia of the two cPRCs reconstructed in a *c-ops-1 $\Delta$ <sup>B/ $\Delta$ B</sup>* larva revealed a more sparsely packed structure (Figure 3E, bottom row; Figure 3—figure supplement 1A, Video 7). Mutant cilia are not significantly shorter than *WT* cPRC cilia (p = 0.076, Wilcoxon test for longer *WT* cilia, Figure 3F). However, we noticed when comparing cross-sections of each genotype that individual branches of mutant cPRC cilia often contained more than one microtubule doublet (arrowheads in Figure 3E; Figure 3—figure supplement 2A). This suggests that cPRC cilia of *c-ops-1 $\Delta$ <sup>B/ $\Delta$ B</sup>* larvae have alterations in branching morphology. We indeed found that the terminal branches of cilia in the mutant are significantly shorter (p = 1.26 E-04 Wilcoxon test for shorter branches in the mutant, Figure 3G, right-most plot), while internal branches are longer than those in the *WT* (p = 1.26 E-04; Wilcoxon test for longer branches in the mutant, Figure 3G, middle plot). Basal branches also tended to be larger, but no statistically significance can be concluded (p = 0.06, Wilcoxon test for longer branches in the mutant, Figure 3G, left-most plot). This result supports the former observation that branching occurs more distally to the basal body in *c-ops-1 $\Delta$ <sup>B/ $\Delta$ B</sup>* larvae. Longer internal branches in mutant cPRC cilia would also explain the presence of ciliary profiles with more than one microtubule doublet (Figure 3—figure supplement 2A).

Overall, our physiological and genetic analyses suggest that the brain cPRCs act as graded and fast-adapting pressure receptors. In *c-ops-1 $\Delta$ <sup>B/ $\Delta$ B</sup>* larvae, the ciliary compartment is smaller and shows morphological defects, revealing a genetic requirement for *c-opsin-1* in the establishment of the sensory compartment and supporting the idea that the cPRC ciliary compartment is the site of pressure transduction.

## Synaptic transmission from serotonergic ciliomotor neurons mediates pressure-induced increases in ciliary beating

The complete synaptic wiring diagram of the cPRCs was previously reported from an electron microscopy volume of a three-day-old larva (Figure 4A-B; Verasztó et al. (2018)). The shortest neuronal path from cPRCs to the prototroch involves a feed-forward loop from the cPRCs to two types of postsynaptic interneurons, the INNOS and the INRGWa cells (Figure 4B). INRGWa cells in turn synapse on a pair of head serotonergic ciliomotor neurons (Ser-h1). Ser-h1 cells directly innervate the prototroch ciliary band and synapse on the MC head cholinergic ciliomotor neuron (Figure 4B). Ser-h1 cells are thought to promote ciliary beating by directly releasing serotonin onto the ciliary band cells and indirectly by inhibiting the cholinergic MC neuron that is required to arrest ciliary beating (Verasztó et al. 2017).

To directly test the involvement of the Ser-h1 cells in the pressure response, we used a genetic strategy to inhibit synaptic release from serotonergic neurons. We used transient transgenesis to drive the expression of the synaptic inhibitor tetanus-toxin light chain (TeTxLC) (Sweeney et al. 1995) under the promoter of *tryptophan hydroxylase* (*TPH*), a marker of serotonergic neurons (Verasztó et al. 2017). The *TPH* promoter labels the head Ser-h1 and other serotonergic cells including the Ser-tr1 trunk ciliomotor neurons. Of the cells labelled with this promoter, only Ser-h1 is postsynaptic to cPRCs and provides strong innervation to the prototroch cells and the MC cell (Verasztó et al. 2017).

The construct (Figure 4C) drives the expression of both TeTxLC and an HA-tagged palmitoylated tdTomato reporter, separated by P2A, a self-cleaving peptide previously used in *Platynereis* (Luis A. Bezares-Calderón et al. 2018). The mosaic expression of this construct resulted in the labeling of different subsets of serotonergic neurons. We selected animals showing labelling in Ser-h1 (most larvae were also labelled in Ser-tr1 and other unidentified serotonergic cells). We confirmed the expression of the transgene in Ser-h1 by immunostaining against the HA-tag of Palmi-tdTomato (Figure 4D). Larvae expressing TeTxLC in Ser-h1 showed an increase in CBF only at the highest pressure used (988 mb p = 0.004; one-tailed paired t-test with Bonferroni correction testing for an increase in CBF; Figure 4E, bottom row). Larvae injected with a control plasmid expressing only Palmi-tdTomato but not TeTxLC in Ser-h1 (Figure 4C) showed a significant increase in CBF at the three highest pressure levels applied (237.5 mb p = 0.023, 556 mb p = 0.009, 988 mb p = 0.004; one-tailed paired t-test with Bonferroni correction testing for an increase in CBF; Figure 4E, top row; Figure 4—figure supplement 1A). The metric max.  $\Delta\%$ CBF was not significantly different between control and TeTxLC-injected larvae (Figure 4—figure supplement 1B). These results indicate that TeTxLC-mediated inhibition of Ser-h1—albeit incomplete and in most cases limited to one of the two cells—leads to a noticeable dampening of the pressure response at the level of the ciliary band. This suggests that synaptic release from serotonergic neurons is required to increase ciliary beating upon pressure increase. Our data support the model that Ser-h1 neurons, and no other serotonergic cells, are specifically required for this response, because this cell type was labelled in all animals tested and these cells directly innervate the prototroch.

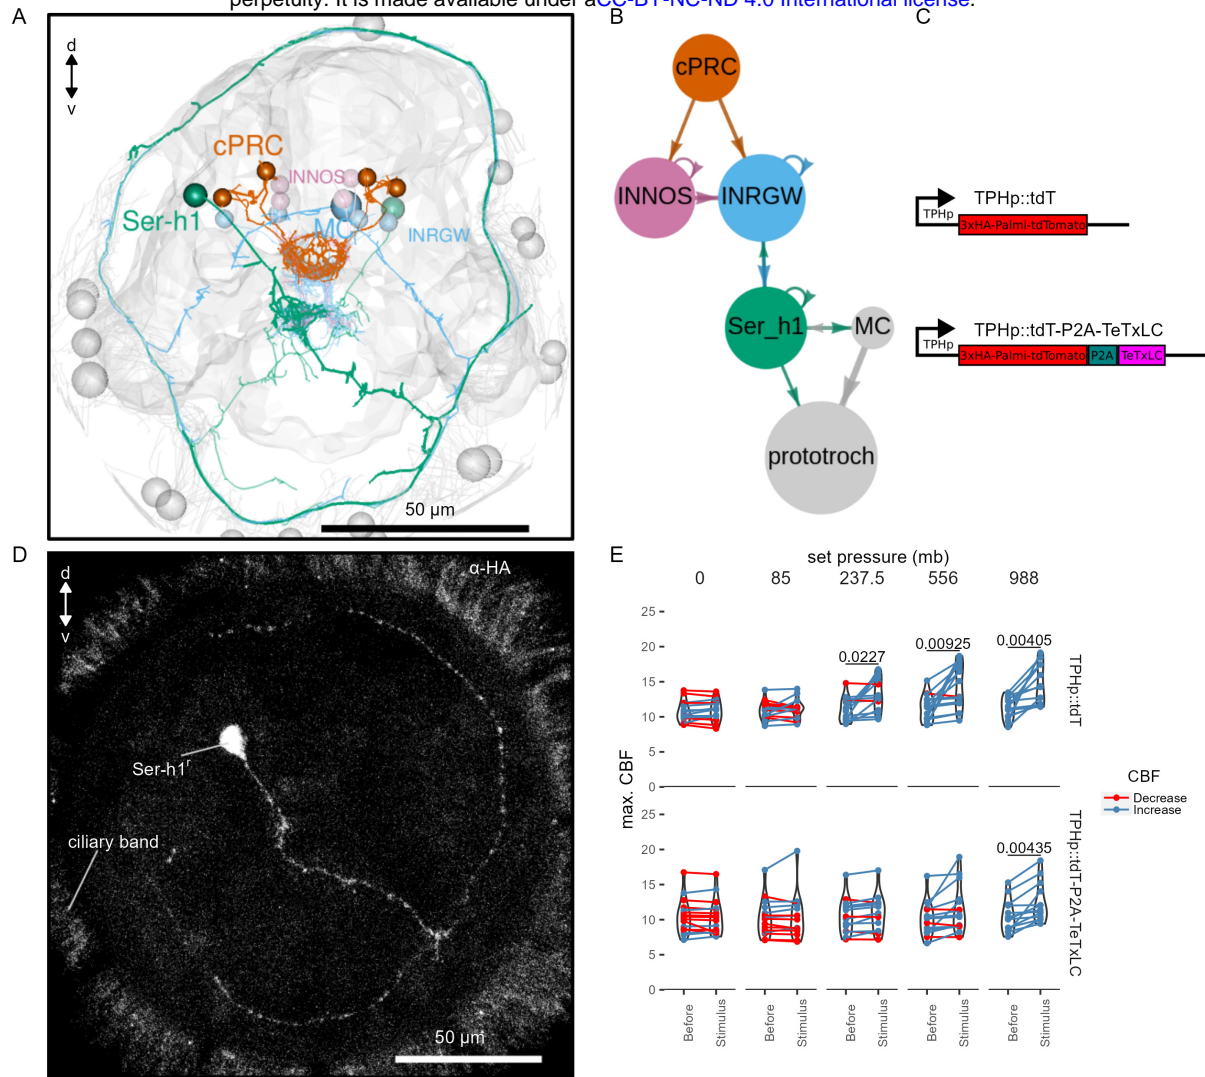

**Figure 4.** TeTxLC expression in Ser-h1 neurons inhibits CBF increase during pressure. (A-B) Volume EM reconstruction (A) of the cells in the cPRC synaptic circuit (B). cPRCs synapse in the middle of the brain on both INNOS and INRGW neurons. INRGW cells synapse on Ser-h1 neurons, which directly innervate the ciliary band and also target the MC cell. Only the cells in the shortest path to the prototroch are included. (C) Schematic of the gene constructs used to test the role of Ser-h1 in the pressure response. The TPHp::tdT construct drives expression of the reporter protein Palmi-tdTomato in Ser-h1 and other serotonergic neurons. It was used as a control. The TPHp::tdT-P2A-TeTxLC construct expresses Palmi-tdTomato and the synaptic blocker TeTxLC as a fusion that gets post-translationally self-cleaved by the P2A peptide. (D) Maximum intensity projections of a larva injected with the TPHp::tdT-P2A-TeTxLC construct and stained with α-HA. Ser-h1 was labelled in this animal. Anterior view. (E) Max. CBF that single larvae reached in the 30 s prior (*Before*), or during the first 30 s of the indicated increase in pressure (*Stimulus*). Data points for the same larva are joined by lines. Larvae were injected either with the control plasmid TPHp::tdT (top row, N = 14-16 larvae), or with the TPHp::tdT-P2A-TeTxLC plasmid (bottom row, N = 13-16 larvae). One-tailed paired t-test with Bonferroni correction testing for an increase in CBF; p-values < 0.05 are shown. Figure 4—source data 1 (E).

## Discussion

This work provides insights into the neuronal mechanisms of pressure sensation and response in a marine planktonic larva. Our findings suggest that increases in pressure, either due to the larva's own actions (sinking or diving) or to downwelling currents, lead to the activation of the sensory cPRCs (Figure 5). The activation is proportional to the magnitude of pressure change and leads to the activation of the downstream circuit that converges onto the Ser-h1 neurons and ultimately leads to increased ciliary beating. The Ser-h1 cells could secrete serotonin (5-HT) onto the ciliary band, which from pharmacological assays is known to increase ciliary beat frequency (Verasztó et al. 2017). Ser-h1 neurons may simultaneously inhibit the cholinergic ciliomotoneuron MC neuron (Verasztó et al. 2017), thereby preventing ciliary arrests while the larva tries to compensate for the increased pressure. Upon a decrease in pressure, three-day-old (but not two-day-old) larvae also show an off-response characterised by downward swimming. We have not analysed in detail the neuronal mechanisms of this response but it may depend on an inverted activation of the cPRC circuit, as happens during UV avoidance (Jokura et al. 2023). Pressure 'on' and pressure 'off' thus induce behavioural responses with opposite sign such that larvae move to compensate for the pressure change. The response is directional along the pressure gradient (even if larvae do not detect the gradient but temporal changes) and we refer to it as barotaxis.



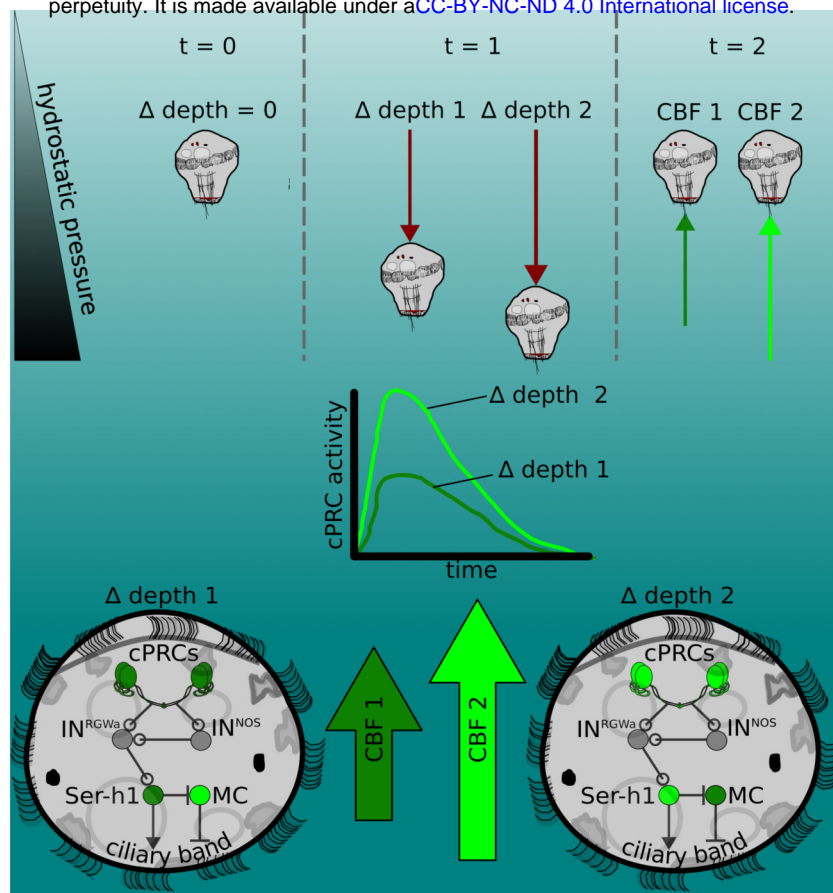

**Figure 5.** The pressure response as a depth-retention mechanism mediated by the ciliary photoreceptor-cell circuit. (Top) *Platynereis* larvae maintain their position in the water column by controlling the beating dynamics of the ciliary band ( $t = 0$ , no net change in depth,  $\Delta \text{depth} = 0$ ). A sufficiently rapid increase in depth (at  $t = 1$ ) caused by intrinsic or extrinsic factors would lead to an increase in hydrostatic pressure. The change in depth relative to the previous state ( $\Delta \text{depth} 1$  or  $\Delta \text{depth} 2$ ) will be perceived by the larva, which will try to counteract this change by increasing ciliary beat frequency of the prototroch, leading to upward swimming (at  $t = 2$ ) until the pressure returns to the level previously experienced. A smaller change in pressure ( $\Delta \text{depth} 1$ ) will lead to a smaller increase in CBF (CBF 1, light green arrow) than a larger change (CBF 2). (Middle) Changes in pressure are sensed by the cPRCs. These sensory cells are activated in a graded manner according to the change in pressure. (Bottom) cPRCs signal via a postsynaptic circuit including the INRGWa and INNOS interneurons to the Ser-h1 neurons. Activation of these serotonergic neurons is required to increase ciliary beating directly on the prototroch cells and indirectly by inhibiting the MC neuron (CBF 1 or CBF2) proportional to the change in pressure.

Our proposed depth-retention model complements a previously reported spectral depth-gauge mechanism in the *Platynereis* larva based on its ability to respond to UV and green light (Verasztó et al. 2018). As previously hypothesized for other planktonic larvae (Sulkin 1984), pressure sensing in *Platynereis* may operate through negative feedback to retain a particular depth, while light as a more variable stimulus could drive intensity and wavelength-dependent changes in the vertical position of larvae. Our unpublished results indeed suggest that green light determines the direction of swimming and can override upward swimming induced by pressure, which only influences the speed of swimming (LABC and GJ, unpublished).

Our unexpected finding that ciliary photoreceptors, previously shown to be sensitive to UV and green light (Verasztó et al. 2018), are also activated by pressure increase suggests that the integration of light and pressure could begin at the sensory level in a single cell type. UV light activates the cPRCs to induce downward swimming while pressure increases induce upward swimming. The calcium dynamics of cPRCs depends on the stimulus applied and may therefore underlie the mechanism by which the cells decode and transmit a sensory signal to the downstream circuit. UV induces a transient increase and subsequent drop in  $\text{Ca}^{2+}$  levels followed by a sharp increase that persists even after UV stimulation ends. In contrast, pressure induces a transient increase in  $\text{Ca}^{2+}$  levels that terminates with the stimulus. These observations suggest that the integration of light and mechanical cues already occurs at the sensory-cell level. The different activation dynamics may lead to the release of different neurotransmitter and neuromodulator cocktails (cPRCs are cholinergic, GABAergic, adrenergic and peptidergic (Williams et al. 2017; Randel et al. 2014; Tessmar-Raible et al. 2007; Jokura et al. 2023)) and different activation patterns in the postsynaptic cells. Similar integration can occur in *Drosophila* larvae, where UV/blue light and noxious mechanical stimuli are detected by the same sensory neuron that together with other cells converges onto a circuit processing multisensory stimuli (Imambocus et al. 2022). In *Platynereis*, other sensory cells (e.g., the  $\text{SN}^{\text{d1-UNP}}$  cells; figure supplement 5) may contribute to distinguishing the nature of the stimulus.

The cellular and molecular mechanisms by which cPRCs sense and transduce changes in hydrostatic pressure deserve further enquiry. The mechanism may involve the differential compression of microtubules along each ciliary branch (Li et al. 2022; Nasrin et al. 2021), or differential displacement of fluid inside the cilium (Bell 2008). The cPRCs have a unique multiciliated structure and are embedded in a protected environment different from fluid-exposed cilia such as hydrodynamic mechanosensory cilia (Luis A. Bezares-Calderón et al. 2018). These features are hard to reconcile with current models of ciliary mechanosensation (e.g., see review by R. Ferreira et al. (2019)). Instead, the mechanism of pressure sensation at work in cPRCs may share more similarities with non-neuronal cells detecting pressure, such as chondrocytes (Pattappa et al. 2019) and trabecular meshwork cells (Luo et al. 2014).

The molecular mechanisms of pressure detection remain unclear. Components of the phototransduction cascade may be involved in pressure sensation. Our results indicate that the ciliary opsin required for detecting UV light is not essential for pressure sensation. This molecule rather indirectly affects the ability of cPRCs to sense pressure by contributing to the development or maintenance of a ramified ciliary sensory structure. The structural role of opsins for shaping ciliary cell morphology has also been reported in other photoreceptor and mechanoreceptor cells (Lem et al. 1999; Zanini et al. 2018). The direct transducer of pressure may be a TRP channel. TRP channels can signal downstream of opsins in phototransduction cascades and have been postulated as the ultimate integrators of sensory stimuli (Liu and Montell 2015). Mechanosensitivity

bioRxiv preprint doi: <https://doi.org/10.1101/2023.02.28.530398>; this version posted November 7, 2023. The copyright holder for this preprint (which was not certified by peer review) is the author/funder, who has granted bioRxiv a license to display the preprint in perpetuity. It is made available under a [CC-BY-NC-ND 4.0 International license](#).  
has also recently been reported for vertebrate rods (Bocchero et al. 2020), including the activation of these ciliary photoreceptors by pressure (Pang, Gao, and Wu 2021). The cellular and molecular mechanisms behind this sensitivity are still unclear, but TRP or Piezo channels were suggested to be involved (Bocchero et al. 2020).

The mechanism by which cPRCs detect pressure in *Platynereis* may also characterise the few other cases of pressure sensors based on ciliated sensory cells (the crab statocyst, and the dog hair cells) (Peter J. Fraser and Shelmerdine 2002; Peter J. Fraser and Macdonald 1994). Multiciliated pressure receptors may be widespread in zooplankton, as cells with a morphology similar to the cPRCs have been observed in species across the animal phylogeny (Hernandez-Nicaise 1984.; Eakin and Kuda 1970; Baatrup 1982), reviewed in (Luis Alberto Bezares-Calderón, Berger, and Jékely 2019). Some of these cells have long been hypothesized to function as pressure sensors. To our knowledge, this study provides the first functional evidence for the role of multiciliated sensory cells in pressure sensation.

cPRCs are part of an ancient neurosecretory centre with putative roles in circadian regulation of locomotion (Williams et al. 2017; Tessmar-Raible et al. 2007; Tosches et al. 2014). Besides light, pressure can also regularly change as a result of diel vertical migration in planktonic stages or tides in settled benthic stages. One of the original components in the first neurosecretory centres may thus have been multimodal sensory cells keeping track of and integrating changes in periodic cues such as light and pressure that allowed to coordinate physiology and behaviour with the natural rhythms.

## Materials and Methods

### Animal culture

*Platynereis dumerilii* worms were cultured in a laboratory facility following established protocols. Larvae were raised in 0.22 µm-filtered artificial sea water (fASW, Tropic Marin) at 37 ppm and kept at 18°C in a 16 h/8 h light-dark cycle. The genotype of each batch made from crosses of *c-ops-1* KO mutant (*c-ops-1<sup>ΔB/ΔB</sup>*) worms was confirmed using the primer set reported in Veraszó et al. (2018).

### Behavioural assays

#### Design and assembly of pressure chambers

##### Large pressure chamber

The chamber's construction was based on an early design by (Lincoln and Gilchrist 1970). In brief, it consisted of a central core of 110 mm (H) x 90 mm (W) x 20 mm (D) with window openings on the lateral, front and bottom sides. Each of the openings had a 12 mm crevice to accept custom-made acrylic plastic windows ([https://github.com/JekelyLab/Bezares\\_et\\_al\\_2023\\_Pressure/blob/main/Data/Mechanical\\_drawings/Zeichnung\\_Fenster\\_Bezares2.pdf](https://github.com/JekelyLab/Bezares_et_al_2023_Pressure/blob/main/Data/Mechanical_drawings/Zeichnung_Fenster_Bezares2.pdf)) (Theodor Schmid GmbH, Tübingen). The windows were fitted into the crevices each with 3mm-thick silicon rubber gaskets and fastened with aluminum plates and screws on top of them. The central working dimensions of the fully assembled chamber are 100 mm x 70 mm x 10 mm (70 ml). A 10 mm diameter threaded opening was bored at the back of the chamber to which a shutoff valve was connected. The design was produced using Blender (blender.org) and translated to a proprietary CAD-based software (eMachineShop, USA; Blender file ([https://github.com/JekelyLab/Bezares\\_et\\_al\\_2023\\_Pressure/blob/main/Data/Mechanical\\_drawings/Aluminium\\_Chamber.blend](https://github.com/JekelyLab/Bezares_et_al_2023_Pressure/blob/main/Data/Mechanical_drawings/Aluminium_Chamber.blend)), EMS file ([https://github.com/JekelyLab/Bezares\\_et\\_al\\_2023\\_Pressure/blob/main/Data/Mechanical\\_drawings/Aluminium\\_Chamber.ems](https://github.com/JekelyLab/Bezares_et_al_2023_Pressure/blob/main/Data/Mechanical_drawings/Aluminium_Chamber.ems))). The chamber was made of anodized aluminum alloy 6061 T6 using CNC machining techniques (eMachineShop, USA). The final threading was made in a workshop (Hans Mast GmbH, Tübingen).

##### Small pressure chamber

A small chamber was used for experiments with fewer larvae per batch. This chamber was also utilized for the ciliary dynamics experiments (see below). The design followed that of the big chamber, except that this chamber had acrylic windows on all sides. The central working dimensions of the fully assembled chamber are 40 mm x 30 mm x 10 mm (12 ml). It was machined in aluminum by the EMBL mechanical workshop in Heidelberg.

### Behavioural experiments

A mix of age-matched batches of larvae from different crosses were added to the pressure chamber. The chamber was not filled completely to minimize water disturbances upon the addition of air. Bubbles adhered to the edges and walls of the chamber were removed with a plastic mixer. Behaviour was recorded in effective darkness with near-infrared LED stripes (850 nm, cat#: 15412085A9000 Würth Elektronik, Germany) placed on each side of the chamber. A CCD camera (DMK31BF03 or DMK41BF02, Imaging source, Germany) was placed in front of the chamber at a distance sufficient to capture the entire behavioural arena in the field of view. The camera was triggered in most experiments at 10 fps via TTL communication with an Arduino microcontroller (Arduino Uno R3, Arduino, Italy).

The chamber was connected to a compressed air tank (Zero Grade Air, Hydrocarbons R&A, 270029-AZ-C, BOC) using locally sourced fittings and hoses. The flow of air into and out of the chamber was controlled with a pair of solenoid valves (SV, Cat# 293478, Burkert, Germany, and ST-DA018S030F-012DC, JP Fluid Control, The Netherlands). Pressure was recorded across each trial with either a 50, 100, 250 or 1000 mb pressure transducer (cat# 8285701, 8285713, 8285726, 7975043, RS-PRO, UK) with a voltage output linearly related to pressure. The pressure reading feedbacks to the SVs via the Arduino to maintain a constant pressure level, updating the reading faster than the acquisition speed (Arduino scripts used: `sketch_WorkingScript_1_twovalvesNOavgUVNOvalvedelayLogicPressur.ino` ([https://github.com/JekelyLab/Bezares\\_et\\_al\\_2023\\_Pressure/blob/main/Code/PressureControl/sketch\\_WorkingScript\\_1\\_twovalvesNOavgUVNOvalvedelayLogic](https://github.com/JekelyLab/Bezares_et_al_2023_Pressure/blob/main/Code/PressureControl/sketch_WorkingScript_1_twovalvesNOavgUVNOvalvedelayLogic)) for the 50, 100, and 250 mb transducers and `PressureProgram_1000mb.ino` ([https://github.com/JekelyLab/Bezares\\_et\\_al\\_2023\\_Pressure/blob/main/Code/PressureControl/PressureProgram\\_1000mb/PressureProgram\\_1000mb.ino](https://github.com/JekelyLab/Bezares_et_al_2023_Pressure/blob/main/Code/PressureControl/PressureProgram_1000mb/PressureProgram_1000mb.ino)) for the 1000 mb transducer). For the longer-term pressure adaptation experiments, the same setup was used, but a voltage equivalent to 100 mb or 500 mb was used as basal pressure and kept constant. A manual proportional valve downstream of the solenoid valve was used to adjust the rate of linear increase in pressure.

To increase pressure using a column of water, a flexible hose filled with sea water was screwed to the pressure chamber pre-loaded with the larvae under water to avoid introducing air into the system. The hose had ball valves at both ends (see Fig Supplement 2C). The valve closer to the chamber was closed after connecting the hose to the chamber. The hose was straightened to the desired height (an equivalence of 1 cm to 1 mb was assumed), and the upper valve was opened at this moment. To increase pressure inside the chamber the lower valve was opened. To release pressure the hose was lowered to the level of the chamber. Pressure levels between 10 and 100 mb with 10 mb increments were chosen and applied in a randomized order.

## Stimulation protocol

The general protocol consisted of recording the vertical swimming behaviour of larvae for 10 s before pressure was increased as a step function of time. Pressure was held at a set value for a defined amount of time; stimulus duration was in most cases 60 s. A list of target pressure values or rates of pressure increase/decrease were applied to the same group of larvae in randomized order (List randomization, random.org (random.org)). A resting period of 5 to 10 min was allowed between trials.

## Data analysis

Tracks of swimming larvae (in XY coordinates) were extracted from the recordings using a modified version of the script by Gühmann et al (Gühmann et al. 2015) (`BatchBehaviourTrackExtraction.ijm` ([https://github.com/JekelyLab/Bezares\\_et\\_al\\_2023\\_Pressure/blob/main/Code/BatchBehaviour/BatchBehaviourTrackExtraction.ijm](https://github.com/JekelyLab/Bezares_et_al_2023_Pressure/blob/main/Code/BatchBehaviour/BatchBehaviourTrackExtraction.ijm))). Each recording was split into one-second fragments (in most cases 10 frames long), from which tracks spanning the full second were obtained with the MTrack2 (<https://valelab4.ucsf.edu/~nstuurman/ljplugins/MTrack2.html>) plugin (Nico Stuurman) and formatted into a table using R (`ReadMTrack2files.R` ([https://github.com/JekelyLab/Bezares\\_et\\_al\\_2023\\_Pressure/blob/main/Code/BatchBehaviour/ReadMTrack2files.R](https://github.com/JekelyLab/Bezares_et_al_2023_Pressure/blob/main/Code/BatchBehaviour/ReadMTrack2files.R))).

The track coordinates were used to calculate a range of metrics (script `MeasuresTracks.R` ([https://github.com/JekelyLab/Bezares\\_et\\_al\\_2023\\_Pressure/blob/main/Code/BatchBehaviour/MeasuresTracks.R](https://github.com/JekelyLab/Bezares_et_al_2023_Pressure/blob/main/Code/BatchBehaviour/MeasuresTracks.R))) according to the formulae in Table 1.

**Table 1.** Swimming metrics

| Metric                             | Formula                                                                                                                                                                                                  |
|------------------------------------|----------------------------------------------------------------------------------------------------------------------------------------------------------------------------------------------------------|
| Average vertical displacement      | $\frac{\sum_{j=1}^{\#Tracks} \sum_{i=1}^{\#Frames} (Y_{j,i+1} - Y_{j,i})}{\#Tracks \times \#Frames} \times Frame\ rate \times mm\ px^{-1}$                                                               |
| Vertical movement                  | $\frac{\sum_{j=1}^{\#Tracks} \frac{(Y_{j,fin,pos} - Y_{j,init,pos})}{\#Frames_j}}{\#Tracks} \times Frame\ rate \times mm\ px^{-1}$                                                                       |
| Average speed                      | $\frac{\sum_{j=1}^{\#Tracks} \sum_{i=1}^{\#Frames} \sqrt{(X_{j,i+1} - X_{j,i})^2 + (Y_{j,i+1} - Y_{j,i})^2}}{\#Tracks \times \#Frames} \times Frame\ rate \times mm\ px^{-1}$                            |
| Average straightness vertical path | $\frac{\sum_{j=1}^{\#Tracks} \sum_{i=1}^{\#Frames} \frac{(Y_{j,i+1} - Y_{j,i})}{\sqrt{(X_{j,i+1} - X_{j,i})^2 + (Y_{j,i+1} - Y_{j,i})^2}}}{\#Tracks \times \#Frames}$                                    |
| Straightness index                 | $\sum_{j=1}^{\#Tracks} \frac{\sqrt{(X_{j,fin,pos} - X_{j,init,pos})^2 + (Y_{j,fin,pos} - Y_{j,init,pos})^2}}{\sum_{i=1}^{\#Frames} \sqrt{(X_{j,i+1} - X_{j,i})^2 + (Y_{j,i+1} - Y_{j,i})^2}} / \#Tracks$ |

A maximum of 400 tracks per file were analysed. Only data containing more than 50 tracks for single-batch experiments, or by 100 or more tracks for experiments using a mix of multiple batches were used for analysis.

Where indicated, results were averaged across trials, and the value normalized relative to average displacement prior to stimulus onset. Maximal values were obtained from smoothed triangular averages (i.e. a single moving average calculated twice, each with a window size of 5). For the long-exposure experiments, the percent increase in pressure at a time point  $t$  was calculated as follows:

$$\%pressure\_increment_t = \frac{(pressure_t + 1000) * 100}{pressure\_prior + 1000} - 100$$

assuming the ambient pressure was ~1000 mb.

Larval distribution along the vertical axis of the pressure vessel was obtained by dividing the image into 5 bins of equal size and counting the number of particles (after thresholding) in each bin. The script `ScriptParticleCounter.ijm` ([https://github.com/JekelyLab/Bezares\\_et\\_al\\_2023\\_Pressure/blob/main/Code/BatchBehaviour/ScriptParticleCounter.ijm](https://github.com/JekelyLab/Bezares_et_al_2023_Pressure/blob/main/Code/BatchBehaviour/ScriptParticleCounter.ijm)) was used for that purpose.

## Ciliary dynamics experiments

### Behavioural setup

To measure the ciliary dynamics of the main ciliary band (prototroch), two-day-old larvae were tethered from the posterior end to a glass cuvette (15 mm x 15 mm x 4 mm) with non-toxic glue (Wormglu, GluStitch Inc). The cuvette was inserted into a custom-made 3D printer adaptor and fitted into an air-tight vessel (small chamber, see above). The vessel was connected to the Arduino-controlled system of solenoid valves and electronic transducer used for the batch experiments. For experiments with injected larvae, fluorescein and reporter signals were confirmed prior to the experiment, but after gluing the larva to the cuvette. Randomized step increases in pressure were applied with a resting interval of 10 min between trials. Larvae in the device were imaged with an AxioZoom V.16 (Carl Zeiss Microscopy, Germany) fitted with a 2.3x objective under effective darkness (i.e. filtering the light from a CL9000 LED lamp with a long-pass filter, cat# 435700-9025-000, Carl Zeiss Microscopy, Germany). Recordings were acquired at 200 Hz with an ORCA Flash 4.0 camera (C11440-22CU, Hamamatsu) using `µManager` (Edelstein et al. 2010).

### Ciliary beat frequency measurements

Kymographs of the entire ciliary band obtained with an ImageJ macro (`CBFrollingAvgSubKimoUnsup.ijm` ([https://github.com/JekelyLab/Bezares\\_et\\_al\\_2023\\_Pressure/blob/main/Code/CBFmeasurement/CBFrollingAvgSubKimoUnsup.ijm](https://github.com/JekelyLab/Bezares_et_al_2023_Pressure/blob/main/Code/CBFmeasurement/CBFrollingAvgSubKimoUnsup.ijm))) were used to measure the ciliary beat frequency (CBF) and the beating state across each trial. The CBF was calculated by adjusting a ridge wave to the wavelet transform of the signal using the ridge extraction mode (bandpass filter: 5–22 Hz) of the MODA numerical toolbox (D. Iatsenko, McClintock, and Stefanovska 2016; Dmytro Iatsenko et al. 2019), implemented with a Matlab script (`batchprocessKymographs.m` ([https://github.com/JekelyLab/Bezares\\_et\\_al\\_2023\\_Pressure/blob/main/Code/CBFmeasurement/batchprocessKymographs.m](https://github.com/JekelyLab/Bezares_et_al_2023_Pressure/blob/main/Code/CBFmeasurement/batchprocessKymographs.m))). A Forward Fourier Transform (FFT) for each time unit was also calculated from the data with the ImageJ macro, but it was not adequate to capture the time-varying frequency in the data. Nonetheless, the FFTs provided an indirect way of identifying ciliary arrests. The following formula was used to measure CBF from the FFTs:

$$CBF = FPS/R$$

bioRxiv preprint doi: <https://doi.org/10.1101/2023.02.28.530398>; this version posted November 7, 2023. The copyright holder for this preprint (which was not certified by peer review) is the author/funder, who has granted bioRxiv a license to display the preprint in perpetuity. It is made available under aCC-BY-NC-ND 4.0 International license.

where FPS is the recording rate, and R is the radius value in the FFT power spectrum image. Ciliary arrests corresponded to R values smaller than 8 or greater than 17 (corresponding to CBF between 11.8 and 25 for 200 fps). An R script (`CBFcalculation.R` ([https://github.com/JekelyLab/Bezares\\_et\\_al\\_2023\\_Pressure/blob/main/Code/CBFmeasurement/CBFcalculation.R](https://github.com/JekelyLab/Bezares_et_al_2023_Pressure/blob/main/Code/CBFmeasurement/CBFcalculation.R))) code was used to integrate pressure logs of each trial and the CBFs measured from wavelet and Fourier transforms, as well as to record the beating state of the band for each second of each trial.

The CBF extracted from the wavelet transforms were averaged using a triangular moving average. The maximum CBF (max. CBF) from these smoothed data obtained for each period (i.e. before, during and after stimulus) of each trial was used for measuring significant changes in CBF. The percentage change in max.CBF during the stimulus period,  $\% \Delta CBF$ , was defined as follows:  $\% \Delta CBF = \left( \frac{CBF - meanCBF_{prior}}{meanCBF_{prior}} \right) \times 100$ , where  $meanCBF_{prior}$  is the average CBF (after applying the rolling average) before stimulus onset.

## Calcium imaging

### Imaging setup

Two-day-old or three-day-old larvae injected with a mix of *GCaMP6s* (~1 µg/µl) and *Palmitoylated-tdTomato* mRNA (< 0.2 ng/µl; see Microinjection and generation of plasmid constructs and mRNA section) were embedded in ~2.7% low-melting agarose (HR8-092, Hampton Research) with an anterior to posterior orientation and placed on a ø25 mm coverslip (CB00250RAC33MNZ0, EpreDia). A water-tight enclosure around the agarose pad was adhered with Vaseline® Jelly to the coverslip. ~120 µl fASW were added to the enclosure to keep the larva under water during the experiment. The preparation was inserted in the central cavity of a custom-made acrylic chamber (STEP file ([https://github.com/JekelyLab/Bezares\\_et\\_al\\_2023\\_Pressure/blob/main/Data/Mechanical\\_drawings/Microscopy\\_pressure\\_chamber.step](https://github.com/JekelyLab/Bezares_et_al_2023_Pressure/blob/main/Data/Mechanical_drawings/Microscopy_pressure_chamber.step)) and Mechanical drawing file ([https://github.com/JekelyLab/Bezares\\_et\\_al\\_2023\\_Pressure/blob/main/Data/Mechanical\\_drawings/Microscopy\\_pressure\\_chamber.pdf](https://github.com/JekelyLab/Bezares_et_al_2023_Pressure/blob/main/Data/Mechanical_drawings/Microscopy_pressure_chamber.pdf))) and firmly held with an aluminium disk (~3 mm thick) screwed into the chamber. A silicone gasket was used to reduce air leakages. The chamber's pipeline was plugged into the compressed air system shown in Figure 1A to control pressure levels.

### Image acquisition and analysis

Z-stacks and time-lapse (TL) recordings were acquired with an inverted Zeiss LSM880 confocal microscope (<http://biosciences.exeter.ac.uk/bioimaging/equipment/light/zeisslsm880airyscan/>) with the 488 nm argon laser set at 1% intensity, and the He 543 laser at 0.5% with a 40x water objective (421767-9971-790, Carl Zeiss Microscopy). Z-stacks of the entire larva were acquired immediately before, during and after increasing pressure to ~750 mb. TLs were acquired at ~4.85 Hz for 120 s. Randomized step increases in pressure were applied for 60 s after recording basal activity for 30 s. The change in focus in TL recordings induced by the increase in pressure was corrected by automatically shifting the recording plane to the predicted new focal plane as soon as pressure started increasing, followed by stabilization of the imaging plane with an infrared light-based system (DefiniteFocus2, Carl Zeiss Microscopy). The same procedure was applied when pressure was brought back to ambient levels.

Z-stacks acquired before, during and after stimulus were aligned with Fijiyama (Fernandez and Moisy 2020) using the tdTomato signal as a reference. This strategy was also used to correlate cells in Z-stacks before and after immunostaining (but using isotropic deformation). X-Y shifts in TL recordings were corrected using descriptor-based series registration (Preibisch et al. 2010), followed by measurement of the signal intensity in user-defined ROIs across the TL with an ImageJ script (`ExtractionIntensityValsTomGC.ijm` ([https://github.com/JekelyLab/Bezares\\_et\\_al\\_2023\\_Pressure/blob/main/Code/Calmaging/ExtractionIntensityValsTomGC.ijm](https://github.com/JekelyLab/Bezares_et_al_2023_Pressure/blob/main/Code/Calmaging/ExtractionIntensityValsTomGC.ijm))). A corrected change in fluorescence  $\Delta R/R$  (Luis A. Bezares-Calderón et al. 2018; Böhm et al. 2016)) based on both the *GCaMP6s* and the tdTomato signals was used to quantify neuronal activity (implemented in `GCaMP_TLanalysis.R` ([https://github.com/JekelyLab/Bezares\\_et\\_al\\_2023\\_Pressure/blob/main/Code/Calmaging/GCaMP\\_TLanalysis.R](https://github.com/JekelyLab/Bezares_et_al_2023_Pressure/blob/main/Code/Calmaging/GCaMP_TLanalysis.R))).

## Microinjection and generation of plasmid constructs and mRNA

*Platynereis* embryos were microinjected with mRNA or plasmid constructs following a modified version of the original protocol (Ackermann, Dorresteyn, and Fischer 2005). mRNA was synthesized with the mMESSAGE mMACHINE T7 Transcription Kit (AM1344, Ambion) and eluted in RNase-free water. The plasmid used to synthesize *GCaMP6s* mRNA was previously reported (pLB112 ([https://benchling.com/jekelylab/f/lib\\_sdvdcr5p-plasmidsstock\\_lbdb\\_jekelylab/seq\\_HRS1bW3F-puc57-t7-rpp25utr-gcamp6sasci-agei\\_c1/edit](https://benchling.com/jekelylab/f/lib_sdvdcr5p-plasmidsstock_lbdb_jekelylab/seq_HRS1bW3F-puc57-t7-rpp25utr-gcamp6sasci-agei_c1/edit)), pUC57-T7-RPP2-GCaMP6-RPP2 in (Randel et al. 2014)). The *Palmitoylated tdTomato* (Palmi-tdTom) construct (pUC57-T7-RPP2-Palmi-3xHA-tdTom-RPP2 or pLB260 ([https://benchling.com/jekelylab/f/lib\\_sdvdcr5p-plasmidsstock\\_lbdb\\_jekelylab/seq\\_KpQNaGLw-plb260/edit](https://benchling.com/jekelylab/f/lib_sdvdcr5p-plasmidsstock_lbdb_jekelylab/seq_KpQNaGLw-plb260/edit))) used to synthesize *Palmitoylated tdTom* mRNA was generated by subcloning the *Palmitoylated tdTom* ORF (previously reported in (Luis A. Bezares-Calderón et al. 2018)) into the same vector used for *GCaMP6s* mRNA production.

The *TPHp::Palmi-tdTomato-P2A-TeTxLC* (pLB316 ([https://benchling.com/jekelylab/f/lib\\_sdvdcr5p-plasmidsstock\\_lbdb\\_jekelylab/seq\\_byQ18T5O-puc57-bamhi-tphp-asci-palmi-3xha-tdtomato-agei-p2a-noti-tetxlc-paci/edit](https://benchling.com/jekelylab/f/lib_sdvdcr5p-plasmidsstock_lbdb_jekelylab/seq_byQ18T5O-puc57-bamhi-tphp-asci-palmi-3xha-tdtomato-agei-p2a-noti-tetxlc-paci/edit))) was generated by subcloning the *TeTxLC* ORF amplified from pGEMTEZ-*TeTxLC* into a plasmid encoding the fused Palmi-tdTomato and the P2A self-cleaving peptide sequence (pLB243 ([https://benchling.com/jekelylab/f/lib\\_sdvdcr5p-plasmidsstock\\_lbdb\\_jekelylab/seq\\_mdeLSOGI-plb243/edit](https://benchling.com/jekelylab/f/lib_sdvdcr5p-plasmidsstock_lbdb_jekelylab/seq_mdeLSOGI-plb243/edit))) or pUC57-T7-RPP2-tdTomato-P2A-GCaMP6 in (Luis A. Bezares-Calderón et al. 2018), followed by sub-cloning the entire ORF downstream of the *TPHp* sequence (Verasztó et al. 2017). This plasmid or the control plasmid *TPHp::Palmi-tdTomato* (pLB253 ([https://benchling.com/jekelylab/f/lib\\_sdvdcr5p-plasmidsstock\\_lbdb\\_jekelylab/seq\\_olLuEhx86-plb253/edit](https://benchling.com/jekelylab/f/lib_sdvdcr5p-plasmidsstock_lbdb_jekelylab/seq_olLuEhx86-plb253/edit))), previously described; (Verasztó et al. 2017)) were co-injected with 5 µg/ml dextran fluorescein (D1821, ) at 250 ng/µl in water. pGEMTEZ-*TeTxLC* was a gift from Richard Axel & Joseph Gogos & C. Ron Yu (Addgene plasmid # 32640 (<http://n2t.net/addgene:32640>); RRID:Addgene\_32640).

## Whole mount immunocytochemistry

Whole mount immunostaining was carried out as previously described (Verasztó et al. 2017). Larvae were fixed in 4% formaldehyde made from a 16% stock (15710, Electron Microscopy Sciences) diluted in PBS (NaCl: 137 mM, KCl: 2.7 mM, Na<sub>2</sub>HPO<sub>4</sub>: 10 mM KH<sub>2</sub>PO<sub>4</sub>: 1.8 mM) + 0.1 % Tween for 15 min at RT. Larvae used after Ca<sup>2+</sup> imaging and for assessment of the cPRC cilia volume were incubated overnight at 4°C with a polyclonal rabbit anti-cPRC cilia antibody at 5 µg/ml, and in some cases combined with a rabbit anti-5HT (serotonin) at 2 µg/ml (ImmunoStar Cat# 20080, RRID:AB\_572263). Depending on the aim of the staining, larvae were counterstained with either a mouse monoclonal anti-HA tag antibody (HA-Tag (6E2), #2367, Cell Signaling Technology) or with a mouse monoclonal anti-acetylated tubulin antibody (T6793, Sigma-Aldrich) at 1:250 dilution. Plasmid-injected larvae were also counterstained with the anti-acetylated tubulin antibody and with a rabbit monoclonal anti-HA tag

bioRxiv preprint doi: <https://doi.org/10.1101/2023.02.28.530398>; this version posted November 7, 2023. The copyright holder for this preprint (which was not certified by peer review) is the author/funder, who has granted bioRxiv a license to display the preprint in perpetuity. It is made available under a [CC-BY-NC-ND 4.0 International license](#).  
antibody (HA-Tag (C29F4) 3724P, Cell Signaling Technology). Samples were incubated overnight at 4°C with 1:250 dilutions of the anti-rabbit Alexa Fluor 488 (A-11008, Invitrogen), anti-mouse F(ab) fragment Alexa Fluor 546 (A-11018, Invitrogen) secondary antibodies, and stained with 500 ng/ml DAPI for 15 min at RT.

## cPRCs morphology assessment

### Light microscopy analysis

Z-stacks of larvae stained with the cPRC cilia antibody were acquired with equal acquisition settings and were processed with the ImageJ 3D Object Counter (<https://imagej.nih.gov/ij/plugins/track/objects.html>) (Cordelières et al) plugin through the `VolumeCalc.ijm` ([https://github.com/JekelyLab/Bezares\\_et\\_al\\_2023\\_Pressure/blob/main/Code/cPRCmorphology/VolumeCalc.ijm](https://github.com/JekelyLab/Bezares_et_al_2023_Pressure/blob/main/Code/cPRCmorphology/VolumeCalc.ijm)) script. A threshold intensity that included the entire ciliary structure was manually adjusted for each scan, filtering out structures with less than 1000 voxels. The volumes thus obtained were imported and quantified in R (`VolumecPRCanalysis.R` ([https://github.com/JekelyLab/Bezares\\_et\\_al\\_2023\\_Pressure/blob/main/Code/cPRCmorphology/VolumecPRCanalysis.R](https://github.com/JekelyLab/Bezares_et_al_2023_Pressure/blob/main/Code/cPRCmorphology/VolumecPRCanalysis.R))).

### Electron Microscopy analysis

#### Sample preparation

*c-ops-1<sup>Δ8/Δ8</sup>* larvae used for serial SEM (sSEM) were mounted in 20% Ficoll PM70 (Sigma, cat# F2878) and high-pressure frozen (HPM Live-μ, Labtech). Samples were then dehydrated by freeze substitution using a standard procedure (McDONALD and WEBB 2011) with modifications of the fixation solution (1% osmium tetroxide + 0.5% UA + 0.5% GA + 3% H<sub>2</sub>O). Fixed larvae were embedded in epoxy (EMBED 812/DMP-30, cat#14120, Electron Microscopy Sciences) and sectioned at ~70 nm using a microtome (UC7, Leica) equipped with a diamond knife (histo Jumbo 45° cat#H18592, DiATOME). Image acquisition was done by SEM (GeminiSEM 500, Zeiss) using an energy selective backscatter detector. Sections were elastically aligned with TrakEM2 (Cardona et al. 2012). cPRC cilia were reconstructed in CATMAID (Saalfeld et al. 2009).

This manuscript was written in RMarkdown (*Dynamic Documents with r and Knitr, Second Edition* 2015).

## CRedit authorship contribution statement

**Luis Alberto Bezares Calderón** : Conceptualization, Data curation, Formal Analysis, Investigation, Methodology, Resources, Software, Validation, Visualization, Writing – original draft, Writing – review & editing; **Reza Shahidi** : Investigation, Methodology, Resources; **Gáspár Jékely**: Conceptualization, Data curation, Funding acquisition, Project administration, Software, Supervision, Visualization, Writing – original draft, Writing – review & editing.

## Acknowledgements

We thank Paulina Cherek for fixing and embedding samples for sSEM, Kei Jokura for kindly sharing the anti-cPRC cilia antibody, Cameron Hird, Adam Johnstone and Rebecca Turner for animal husbandry, Sanja Jasek for IT support and data server maintenance, Rebecca Poon for advice on quantification of ciliary dynamics, and Emelie Brodrick and Elizabeth Williams for critical reading of the manuscript. This research was funded by the Wellcome Trust Investigator Award 214337/Z/18/Z and the Biotechnology and Biological Sciences Research Council Response Mode BB/W00853X/1 and ALERT BB/S019499/1 Grant. This project has received funding from the European Research Council (ERC) under the European Union's Horizon 2020 research and innovation programme (grant agreement No 101020792).

## Figure Supplements

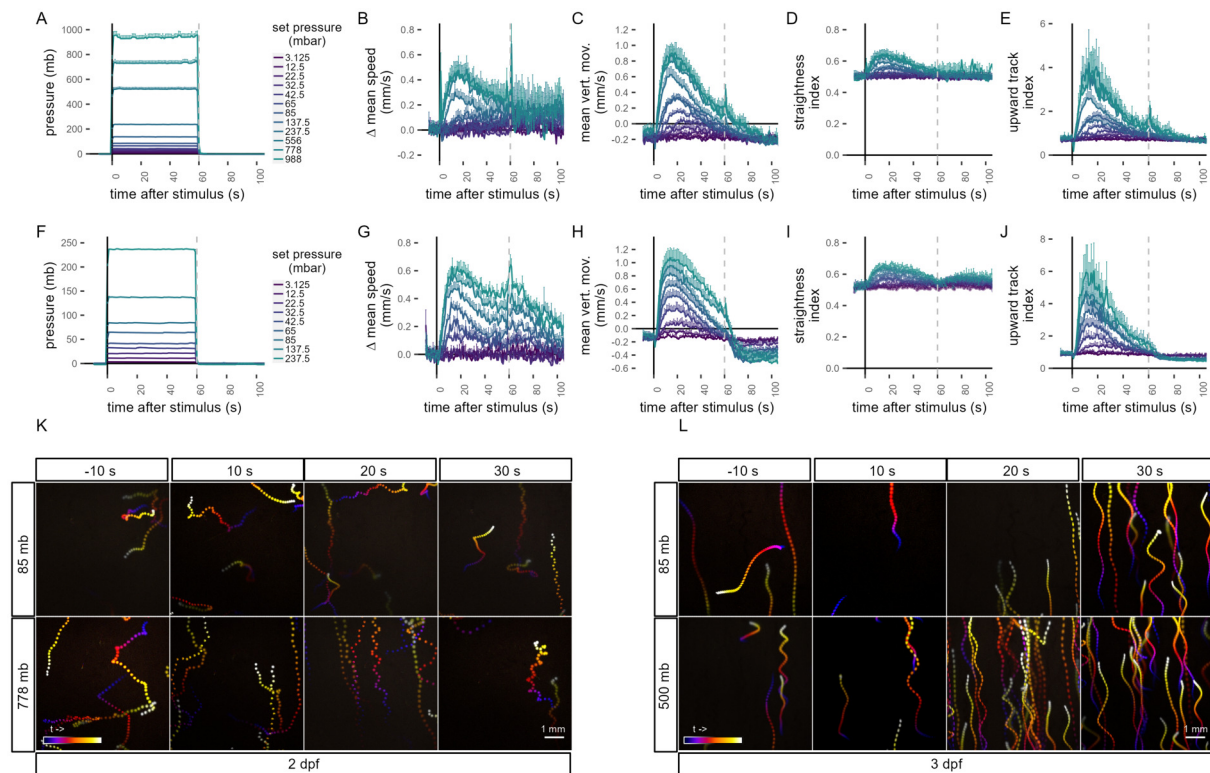

**Figure 1—figure supplement 1.** Quantification of swimming behaviour in *Platynereis* larvae in response to pressure. (A–J) Metrics of the pressure response in two-day-old larvae (A–E), and three-day-old larvae (F–J). Dashed line at 60 s in each plot indicates the end of stimulus. (A,F) Range of step increases in pressure applied to larvae. The step increases were applied in randomized order to each batch of larvae. (B,G) Change in mean speed relative to mean speed before stimulus. (C,H) Mean vertical movement. (D,I) Straightness index. The closer the value is to 1, the less tortuous the track is. (E,J) Upward track index. Defined as the number of upward tracks divided by the number of downward tracks. (K–L) Colour-coded trajectories of 2 day-old (K, Video 2) and 3 day-old (L, Video 3) larvae prior and during a step increase in pressure. Trajectories to two different pressure levels are shown, a moderate (top row), and a high (bottom row) step increase. Each projection is 10 seconds long starting 10 s before stimulus (-10 s, left-most column) and ending in the 30 s after stimulus (30 s, right-most column). Colour code in B–E as in A, and in G–J as in F. Each data point is the average of 2 to 12 (A–E), or 4 to 5 (F–J) batches. Figure 1—source data 1 (A–E), Figure 1—source data 2 (F–J).

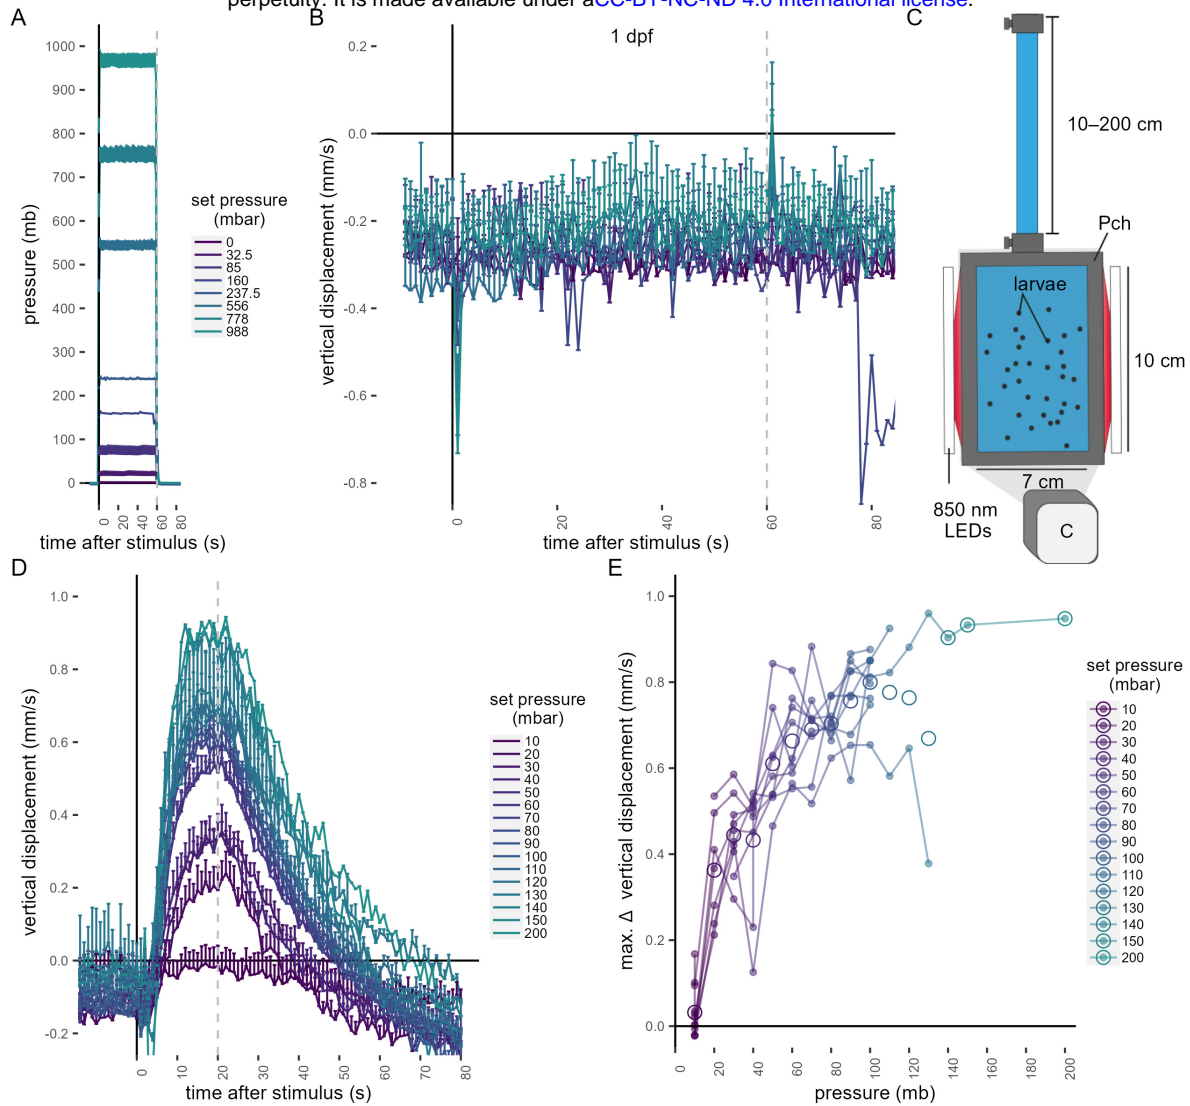

**Figure 1—figure supplement 2.** (A–B) One-day-old *Platynereis* larvae do not respond to small increases in pressure. (A) Range of step increases in pressure applied to one-day-old larvae. (B) Average vertical displacement of one-day-old larvae relative to stimulus onset. Each data point is the average of 1 to 4 batches. (C–E) three-day-old *Platynereis* larvae respond to small changes in hydrostatic pressure applied with a column of water. (C) Schematic of the behavioural setup used to stimulate larvae with a column of water. The height of the column was varied at random between 10 and 200 cm, in 10 cm increments. 1mb  $\approx$  1cm. (D) Vertical displacement as a function of pressure onset. Vertical dashed line at 20 s indicates end of stimulus. (E) Maximum increase in vertical displacement as a function of pressure. Each data point in D–E is the average of up to 12 batches. Data in B colour-coded as in A. Figure 1—source data 5 (A–B), Figure 1—source data 6 (D–E).

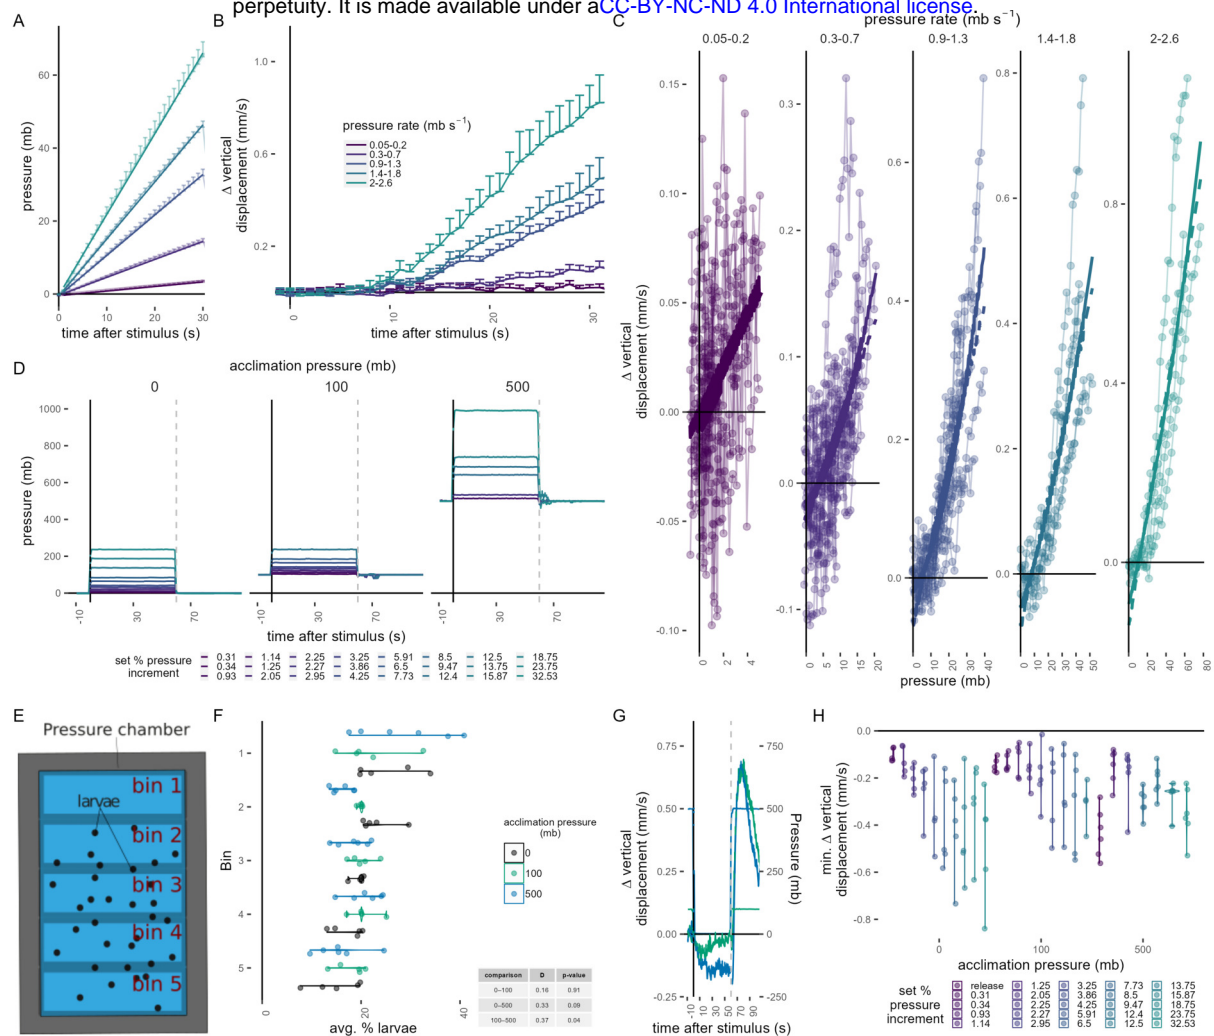

**Figure 1—figure supplement 3.** (A–C) Response of three-day-old larvae to a linear increase in pressure. Each datapoint is the average of 4 to 14 batches. (A) Average linear increase at five different rates (colour code in B) and the fitted curves for the time interval shown. (B) Mean change in vertical displacement at the five different rates of pressure increase shown in A as a function of time. (C) Maximum change in vertical displacement for each rate of pressure increase. Data fitted with either a linear (dashed line) or a 2nd-degree polynomial function (solid line). (D) Average pressure changes applied for data shown in Figure 1F–G. (E–F) Average particle distribution (as a proxy of larval distribution) across the chamber (divided in 5 bins, as schematized in E) prior to pressure stimulus for each batch tested. (G) Mean change in vertical displacement upon release of pressure from 100 mb and 500 mb after testing the step increases in pressure shown in D. The mean pressure change applied is overlaid on the same plot. (H) Maximum decrease in relative vertical displacement after stimulus start for each set increment in pressure across the 3 acclimation conditions. The “release” dataset consists of the trials shown in G. Dashed line at 60 s in D and G indicates the point of pressure release and increase, respectively. 5 (0, 100 mb) or 6 (500 mb) batches tested in D–H. Figure 1—source data 7 (A–C), Figure 1—source data 3 (D, F–H).



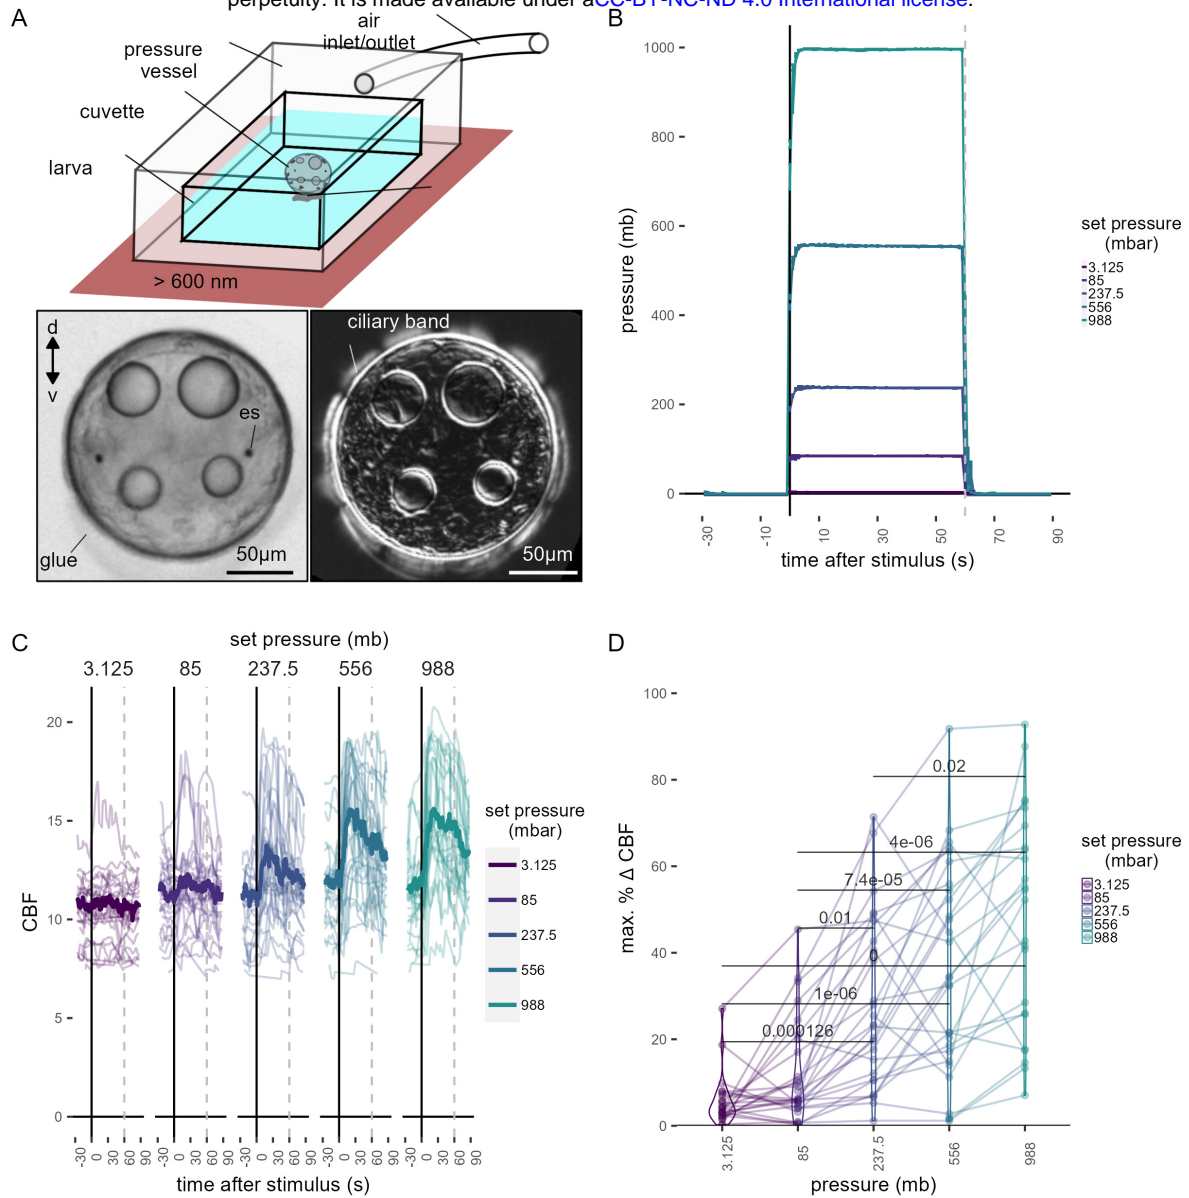

**Figure 1—figure supplement 4.** Ciliary dynamics assay. (A, top) Schematic of the preparation used to quantify ciliary beat frequency. (A, bottom left) Snapshot of a glued two-day-old larva in the pressure setup. (A, bottom right) Standard deviation projection of time-lapse recording to highlight ciliary band activity. (B) Average pressure levels measured during the experiments corresponding to data shown in Figure 1H. The step increases were applied in randomized order to each larva. (C) Maximum percentage change in CBF during the first 30 s of the stimulus period for each of the step increases in pressure tested. One-tailed unpaired t-test with Bonferroni correction. p-values < 0.05 are shown. Data points from the same larva are joined by lines. N= 18–22 larvae. (D) Individual (thin traces) and mean (thick traces) CBF as a function of pressure level. Dashed line indicates end of pressure stimulus. Figure 1—source data 4 (B-D)

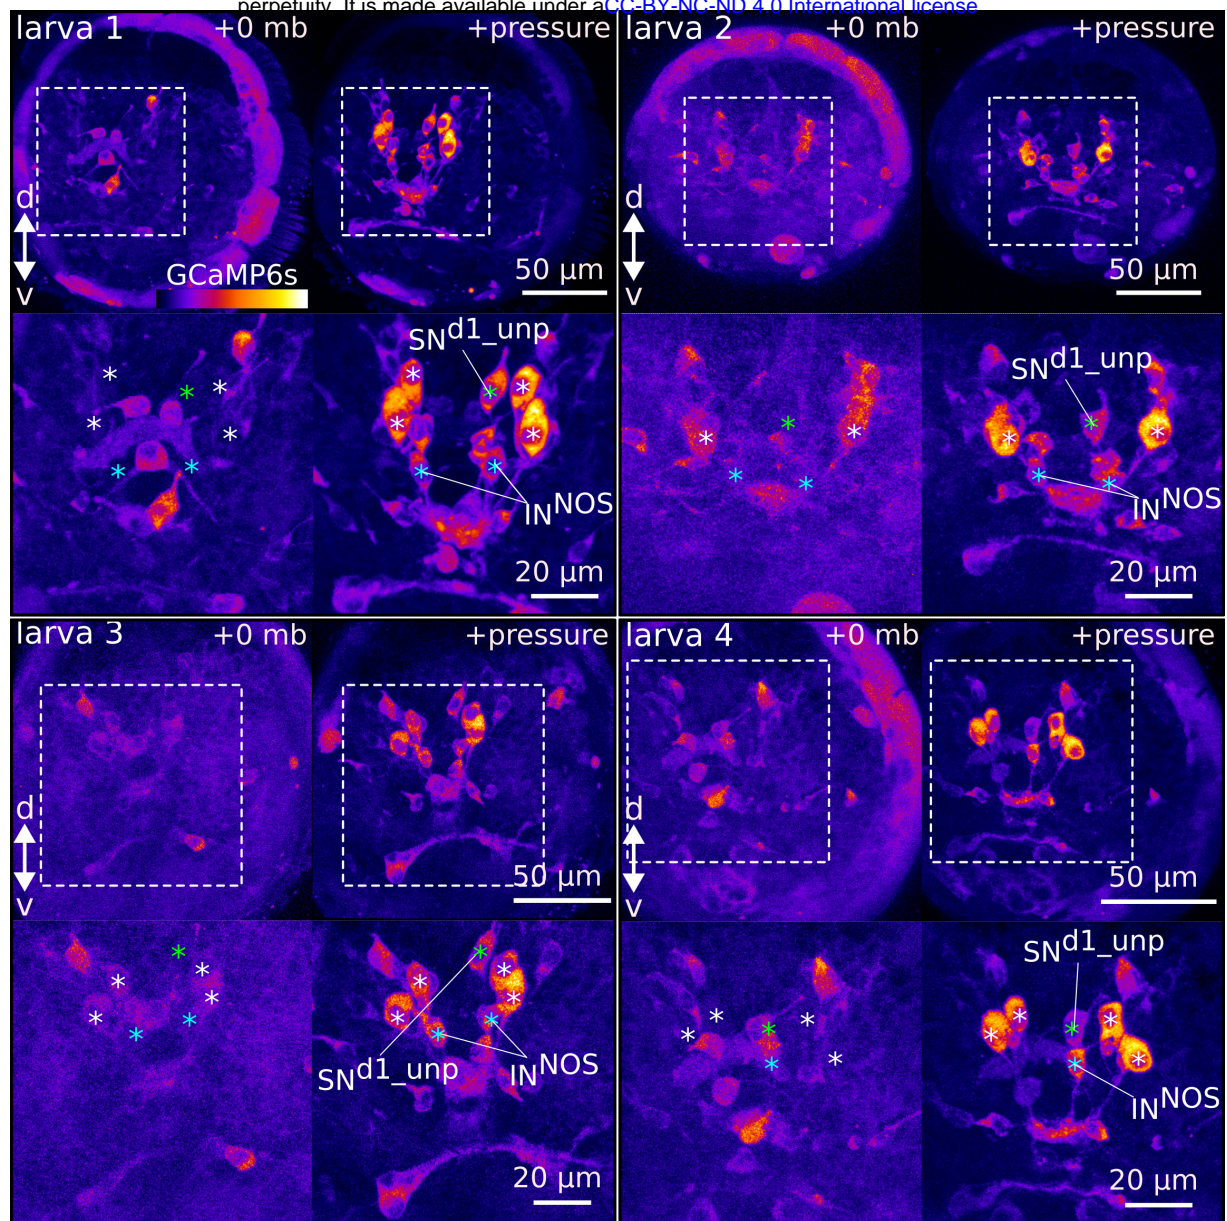

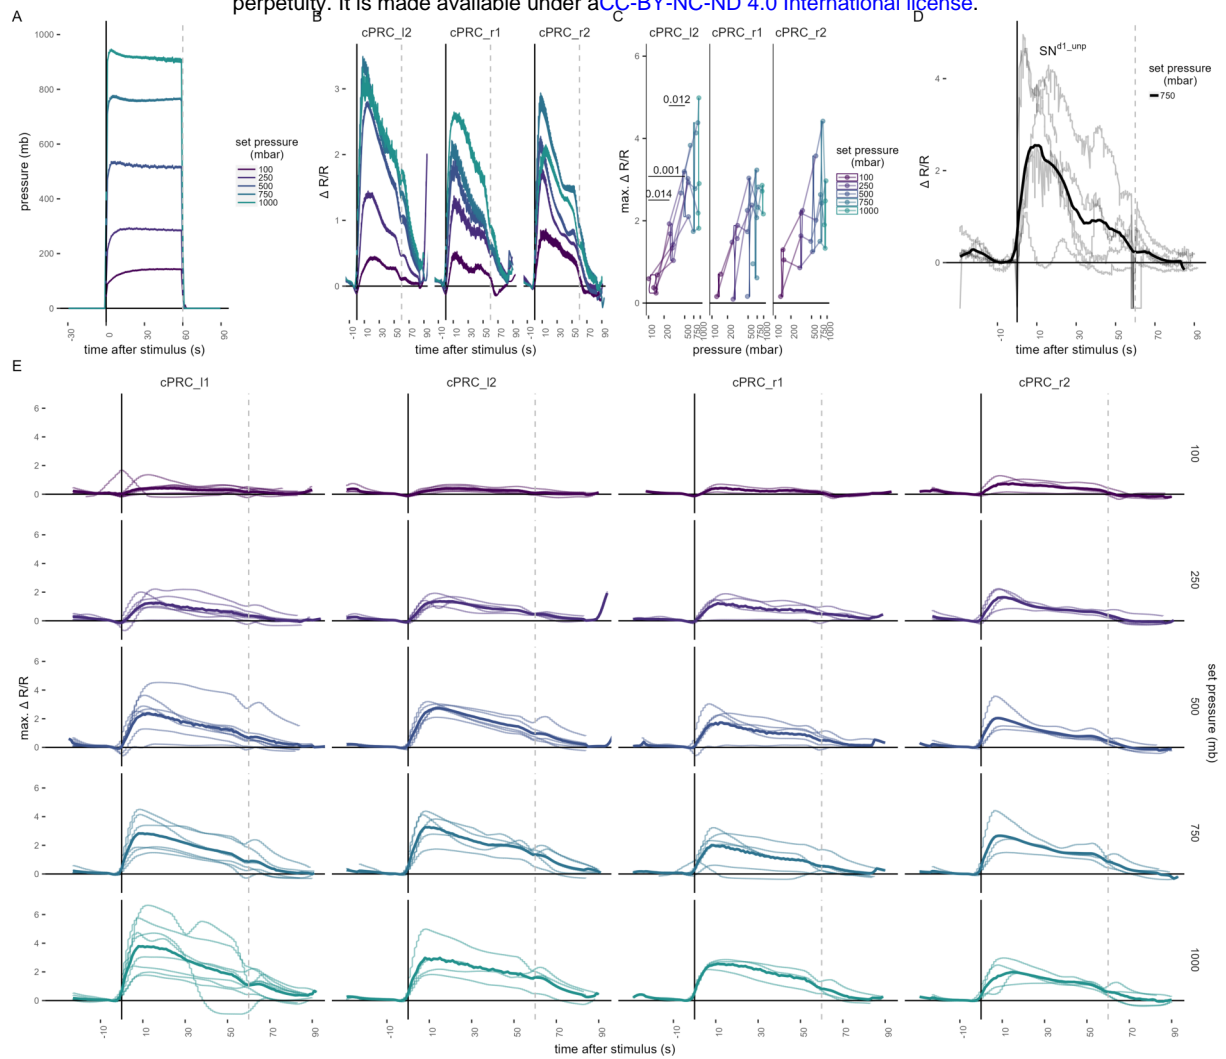

**Figure 2—figure supplement 2.** Ca<sup>2+</sup> imaging in cPRCs and in SN<sup>d1\_ump</sup>. (A) Step pressure increases applied to two-day-old larvae in the Ca<sup>2+</sup> imaging pressure setup (see Figure 2A). The step increases were applied to each larva in a randomized order. (B) Mean  $\Delta R/R$  in cPRC\_r1, cPRC\_l2 and cPRC\_r2 as a function of time relative to pressure increase ( $t = 0$ ). (C) Max.  $\Delta R/R$  in cPRC\_r1, cPRC\_l2 and cPRC\_r2 as a function of pressure level. One-tailed unpaired t-test with Bonferroni correction testing for an increase in Max.  $\Delta R/R$  with pressure. p-values  $< 0.05$  are shown. (D)  $\Delta R/R$  in SN<sup>d1\_ump</sup> upon 750 mb pressure increase. Thick line is the mean of individual measurements (thinner lines). (E) Individual  $\Delta R/R$  measurements (thin lines) in the four cPRCs across different steps of pressure increase as a function of time of stimulation. Thicker line is the mean  $\Delta R/R$  for each pressure level and cell. Dashed lines at 60 s in B-D mark the end of stimulus. N= 2-4 (cPRC\_r1), 4-5 (cPRC\_l2), 4 (cPRC\_r2), 4 (SN<sup>d1\_ump</sup>) cells in B-D. Figure 2—source data 2 (A-E).

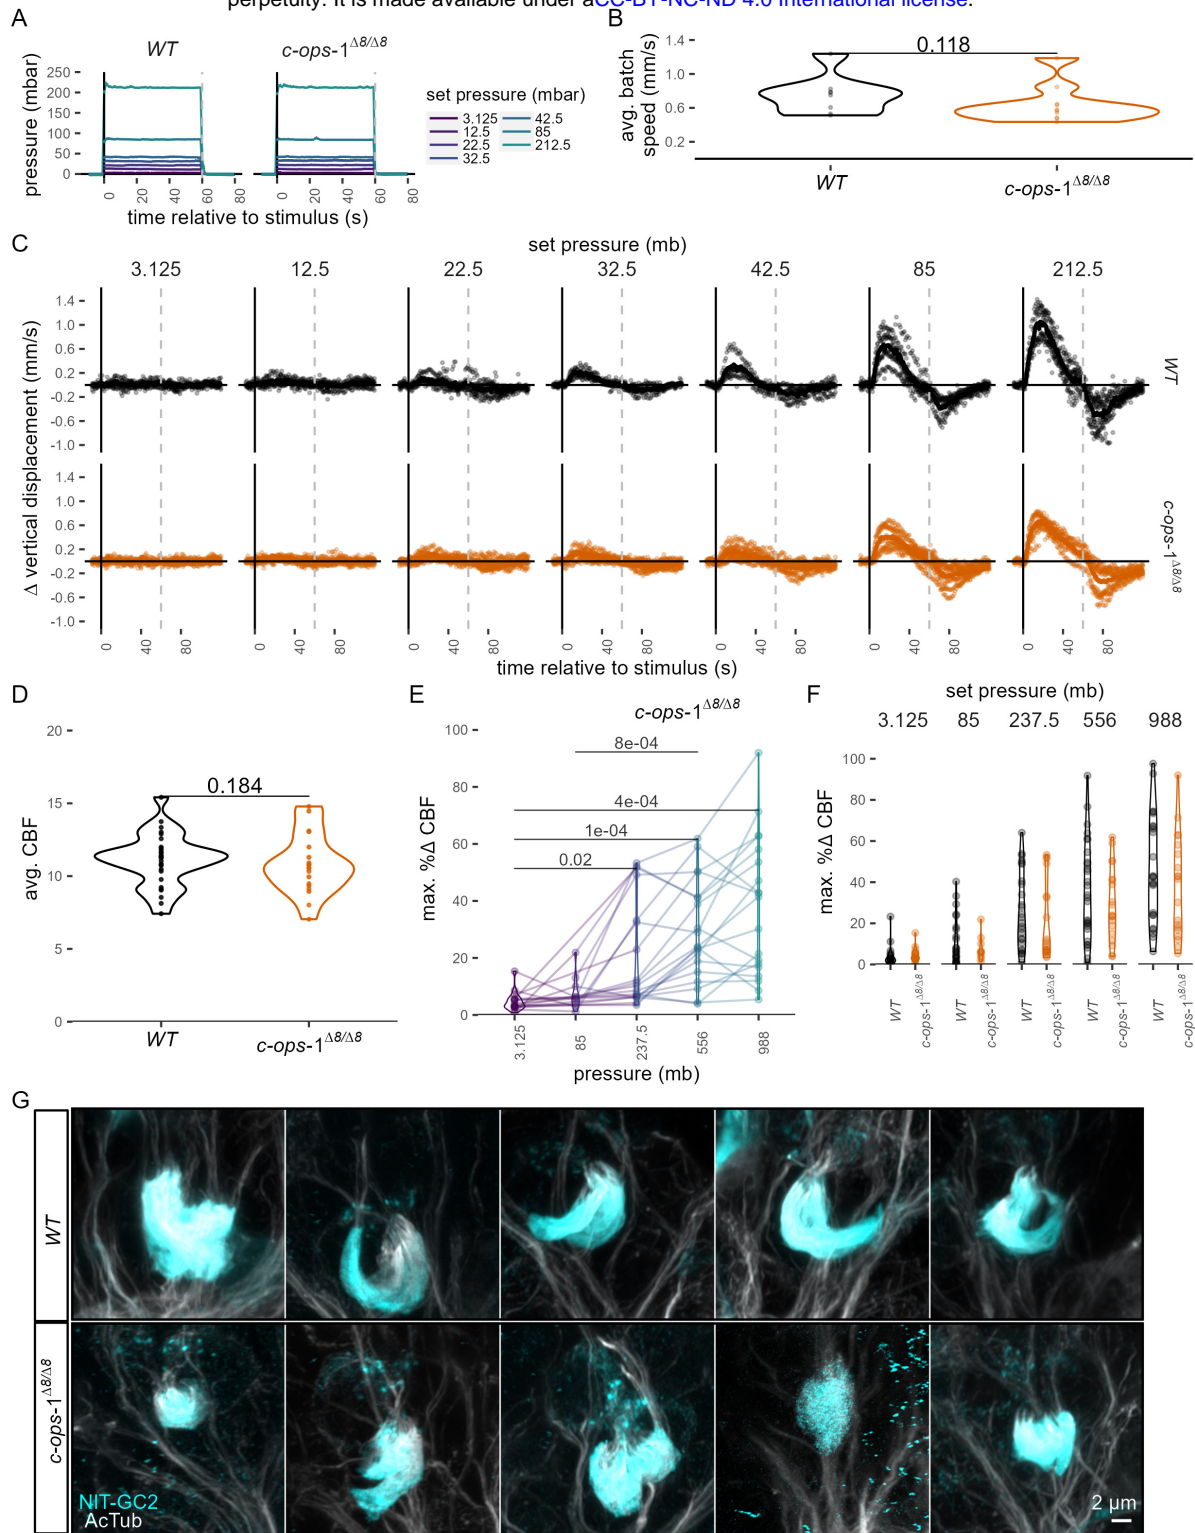

**Figure 3—figure supplement 1.** Response of three-day-old *c-ops-1<sup>Δ8/Δ8</sup>* larvae to pressure. (A) Mean pressure increase steps applied to three-day-old WT or *c-ops-1<sup>Δ8/Δ8</sup>* larvae. (B) Average swimming speed per batch of WT or *c-ops-1<sup>Δ8/Δ8</sup>* larvae in the 10 s prior to pressure increase. One-tailed unpaired Wilcoxon-test testing for a decrease in swimming speed in mutant larvae:  $p = 0.188$ . (C) Change in mean vertical displacement as a function of time of stimulation for each genotype and step increase in pressure. Individual data points are also plotted. Dashed lines at 60 s mark the end of stimulus.  $N = 7-9$  (*c-ops-1<sup>Δ8/Δ8</sup>*) batches,  $N = 8-10$  (WT) batches in A—C. (D) Mean CBF for two-day-old WT or *c-ops-1<sup>Δ8/Δ8</sup>* larvae in the 30 s prior to stimulus onset.  $N = 29$  (WT) 19 (*c-ops-1<sup>Δ8/Δ8</sup>*) larvae. One-tailed unpaired t-test testing for a decrease in CBF in mutant larvae:  $p = 0.786$ . (E) Maximum % change in CBF (% ΔCBF) upon pressure increase in two-day-old *c-ops-1<sup>Δ8/Δ8</sup>* larvae. One-tailed unpaired t-test with Bonferroni correction.  $p$ -values  $< 0.05$  are shown.  $N = 10-17$  larvae. (F) Maximum percentage change in CBF during the first 30 s of the stimulus period in WT ( $N = 18-22$  larvae) and in *c-ops-1<sup>Δ8/Δ8</sup>* ( $N = 10-17$  larvae) 2-day-old larvae. One-tailed unpaired t-test with Bonferroni correction (G) Max. intensity projections of cPRC cilia of two-day-old WT and *c-ops-1<sup>Δ8/Δ8</sup>* larvae used for quantifying cPRC ciliary volume (see Figure 3D). Figure 3—source data 1 (A-C), Figure 1—source data 4 (D-F).

A

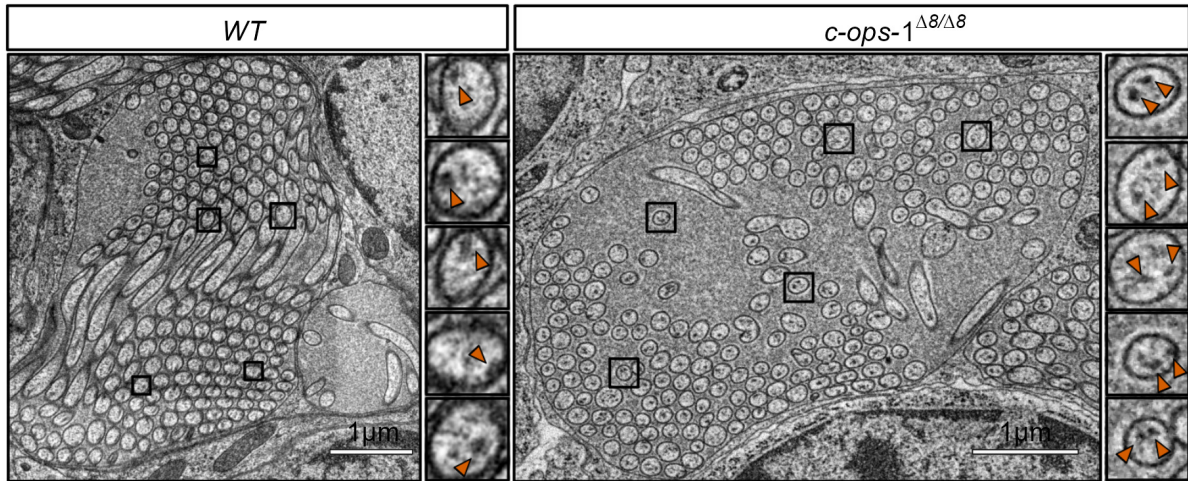

**Figure 3—figure supplement 2.** Morphology of cPRC cilia in three-day-old *c-ops-1 $\Delta 8/\Delta 8$*  larvae. (A) Overview of ultrastructure of cPRC cilia in a *c-ops-1 $\Delta 8/\Delta 8$*  larva. Rectangles highlight branches with 2 pairs of microtubule doublets shown in enlarged views on the right. (B) Length of cPRC cilia of WT (N = 15 cilia) and *c-ops-1 $\Delta 8/\Delta 8$*  (N = 17 cilia) larvae measured from EM volume reconstructions. Unpaired Wilcoxon test for longer branches in the WT larva:  $p = 0.228$ . (C) Length distribution of the branch closest to the basal body (highest Strahler order) for each genotype shown as a percentage of the total ciliary arbor length. One-tailed unpaired Wilcoxon test for longer branches in the mutant:  $p = 0.082$ . (E) Ratio of terminal to internal branch lengths of cPRC cilia for each genotype. Unpaired Wilcoxon test for higher terminal-to-internal branch length ratio in the WT larva:  $p = 0.228$ .

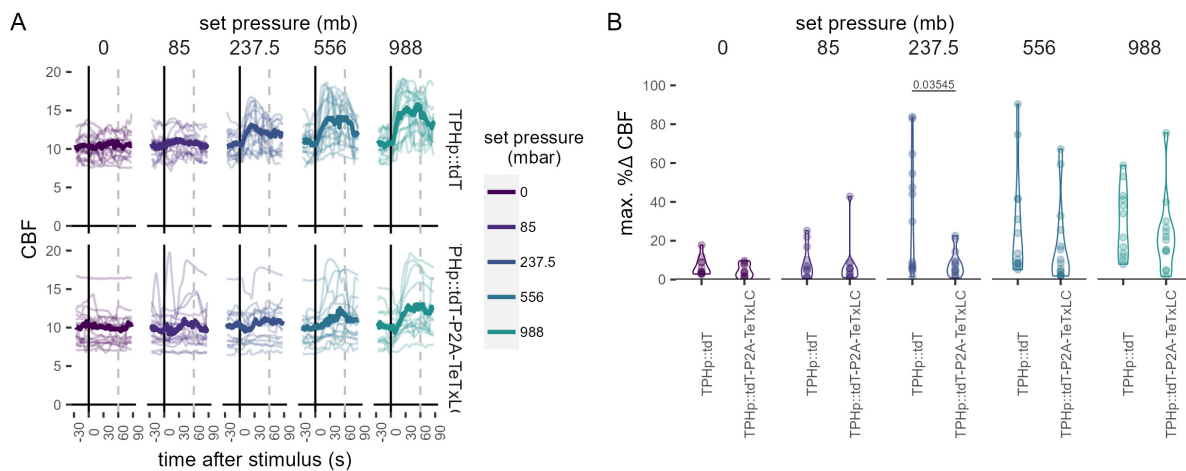

**Figure 4—figure supplement 1.** Effect of TeTxLC-mediated inhibition of serotonergic ciliomotor neurons on CBF during pressure stimulation. (A) Maximum percentage change in CBF during the first 30 s of the stimulus period in 2-day-old larvae injected with the control plasmid TPHp::tdT (N = 14-16 larvae), or with the TPHp::tdT-P2A-TeTxLC plasmid (N = 13-16 larvae). One-tailed unpaired t-test with Bonferroni correction. (B) Individual (thin traces) and mean (thick traces) CBF as a function of pressure level for larvae injected with the indicated plasmid construct. Dashed line indicates end of pressure stimulus. Figure 4—source data 1 (A-B).

## Videos

**Video 1.** Response of 2 day-old *Platynereis* larvae to a pressure increase of 1 bar. Larvae were placed in a pressure vessel (100 mm height) and recorded in effective darkness (with 850 nm light) with a camera placed in front of the vessel (see Figure 1A). Larvae swim towards the top of the chamber as soon as pressure is increased. Blue traces (10 s long) delineate swimming trajectories.

**Video 2.** Zoomed-in view of 2 day-old larvae as they respond to an increase in pressure of 85 mb (left panel) or 500 mb. Blue traces (each 4 s long) delineate swimming trajectories. The two videos are played at the same speed.

**Video 3.** Zoomed-in view of 3 day-old larvae as they respond to an increase in pressure of 32 mb (left panel) or 778 mb. Blue traces (each 4 s long) delineate swimming trajectories. The two videos are played at the same speed.

**Video 4.** Representative recording of a 2 day-old larva tethered to a glass cuvette and imaged from the anterior side to quantify the effect of pressure on the ciliary dynamics. Note how ciliary beating speeds up soon after the step change in pressure (998 mb).

**Video 5.** Time-lapse confocal microscopy recording showing the change in GCaMP6s fluorescence (fire colour scale) in a cPRC as a function of pressure increase (750 mb). The increase in GCaMP6s signal is noticeable both in the cell body (cb) and in the cilia. Some frames are shifted in XY due to sample movement.

**Video 6.** 360° view of electron microscopy reconstruction of sensory cilia from one pair of ciliary photoreceptor cells in a wildtype 3-day-old larva. The branches of each cilium are coloured according to their position along the cilium: basal (pink), intermediate (green) or light blue (terminal). Basal bodies are shown as black spheres. The cell and nucleus of one of the cells is outlined (previously reconstructed in ).

**Video 7.** 360° view of electron microscopy reconstruction of sensory cilia from one pair of ciliary photoreceptor cells in a *c-ops-1<sup>Δ8/Δ8</sup>* 3-day-old larva. The branches of each cilium are coloured according to their position along the cilium: basal (pink), intermediate (green) or light blue (terminal). Basal bodies are shown as black spheres. The part of the cell body imaged in the volume is outlined.

## References

- Ackermann, Christian, Adriaan Dorresteijn, and Albrecht Fischer. 2005. "Clonal Domains in postlarval Platynereis Dumerilii (Annelida: Polychaeta)." *Journal of Morphology* 266 (3): 258–80. <https://doi.org/10.1002/jmor.10375> (<https://doi.org/10.1002/jmor.10375>).
- Akiyama, Tadashi. 2004. "Entrainment of the Circatidal Swimming Activity Rhythm in the Cumacean Dimorphostylis Asiatica (Crustacea) to 12.5-Hour Hydrostatic Pressure Cycles." *Zoological Science* 21 (1): 29–38. [https://doi.org/10.2108/0289-0003\(2004\)21\[29:eotcsa\]2.0.co;2](https://doi.org/10.2108/0289-0003(2004)21[29:eotcsa]2.0.co;2) ([https://doi.org/10.2108/0289-0003\(2004\)21\[29:eotcsa\]2.0.co;2](https://doi.org/10.2108/0289-0003(2004)21[29:eotcsa]2.0.co;2)).
- Arendt, Detlev, Kristin Tessmar-Raible, Heidi Snyman, Adriaan W. Dorresteijn, and Joachim Wittbrodt. 2004. "Ciliary Photoreceptors with a Vertebrate-Type Opsin in an Invertebrate Brain." *Science* 306 (5697): 869–71. <https://doi.org/10.1126/science.1099955> (<https://doi.org/10.1126/science.1099955>).
- Baatrup, Erik. 1982. "On the Structure of the Corpuscles of de Quatrefages (*Branchiostoma Lanceolatum*(P))." *Acta Zoologica* 63 (1): 39–44. <https://doi.org/10.1111/j.1463-6395.1982.tb00757.x> (<https://doi.org/10.1111/j.1463-6395.1982.tb00757.x>).
- Bell, Andrew. 2008. "The Pipe and the Pinwheel: Is Pressure an Effective Stimulus for the 9+0 Primary Cilium?" *Cell Biology International* 32 (4): 462–68. <https://doi.org/10.1016/j.cellbi.2008.03.001> (<https://doi.org/10.1016/j.cellbi.2008.03.001>).
- Bezares-Calderón, Luis A, Jürgen Berger, Sanja Jasek, Csaba Verasztó, Sara Mendes, Martin Gühmann, Rodrigo Almeda, Réza Shahidi, and Gáspár Jékely. 2018. "Neural Circuitry of a Polycystin-Mediated Hydrodynamic Startle Response for Predator Avoidance." *eLife* 7 (December). <https://doi.org/10.7554/elife.36262> (<https://doi.org/10.7554/elife.36262>).
- Bezares-Calderón, Luis Alberto, Jürgen Berger, and Gáspár Jékely. 2019. "Diversity of Cilia-Based Mechanosensory Systems and Their Functions in Marine Animal Behaviour." *Philosophical Transactions of the Royal Society B: Biological Sciences* 375 (1792): 20190376. <https://doi.org/10.1098/rstb.2019.0376> (<https://doi.org/10.1098/rstb.2019.0376>).
- Blaxter, J. H. S. 1978. "Baroreception." In *Sensory Ecology*, edited by M. A. Ali, 375–409. Boston, MA: Springer US. [https://doi.org/10.1007/978-1-4684-3363-0\\_15](https://doi.org/10.1007/978-1-4684-3363-0_15) ([https://doi.org/10.1007/978-1-4684-3363-0\\_15](https://doi.org/10.1007/978-1-4684-3363-0_15)).
- Bocchero, Ulisse, Fabio Falleroni, Simone Mortal, Yunzhen Li, Dan Cojoc, Trevor Lamb, and Vincent Torre. 2020. "Mechanosensitivity Is an Essential Component of Phototransduction in Vertebrate Rods." Edited by Samer Hattar. *PLoS Biology* 18 (7): e3000750. <https://doi.org/10.1371/journal.pbio.3000750> (<https://doi.org/10.1371/journal.pbio.3000750>).
- Böhm, Urs Lucas, Andrew Prendergast, Lydia Djenoune, Sophie Nunes Figueiredo, Johanna Gomez, Caleb Stokes, Sonya Kaiser, et al. 2016. "CSF-Contacting Neurons Regulate Locomotion by Relaying Mechanical Stimuli to Spinal Circuits." *Nature Communications* 7 (1). <https://doi.org/10.1038/ncomms10866> (<https://doi.org/10.1038/ncomms10866>).
- Cardona, Albert, Stephan Saalfeld, Johannes Schindelin, Ignacio Arganda-Carreras, Stephan Preibisch, Mark Longair, Pavel Tomancak, Volker Hartenstein, and Rodney J. Douglas. 2012. "TrakEM2 Software for Neural Circuit Reconstruction." Edited by Aravinthan Samuel. *PLoS ONE* 7 (6): e38011. <https://doi.org/10.1371/journal.pone.0038011> (<https://doi.org/10.1371/journal.pone.0038011>).
- Chen, Tsai-Wen, Trevor J. Wardill, Yi Sun, Stefan R. Pulver, Sabine L. Renninger, Amy Baohan, Eric R. Schreiter, et al. 2013. "Ultrasensitive Fluorescent Proteins for Imaging Neuronal Activity." *Nature* 499 (7458): 295–300. <https://doi.org/10.1038/nature12354> (<https://doi.org/10.1038/nature12354>).
- Dynamic Documents with r and Knitr, Second Edition*. 2015. Chapman; Hall/CRC. <https://doi.org/10.1201/9781315382487> (<https://doi.org/10.1201/9781315382487>).
- Eakin, Richard M., and Aileen Kuda. 1970. "Ultrastructure of Sensory Receptors in Ascidian Tadpoles." *Zeitschrift Für Zellforschung Und Mikroskopische Anatomie* 112 (3): 287–312. <https://doi.org/10.1007/bf02584045> (<https://doi.org/10.1007/bf02584045>).
- Edelstein, Arthur, Nenad Amodaj, Karl Hoover, Ron Vale, and Nico Stuurman. 2010. "Computer Control of Microscopes Using µManager." *Current Protocols in Molecular Biology* 92 (1). <https://doi.org/10.1002/0471142727.mb1420s92> (<https://doi.org/10.1002/0471142727.mb1420s92>).
- Fernandez, Romain, and Cédric Moisy. 2020. "FijiYama: A Registration Tool for 3D Multimodal Time-Lapse Imaging." Edited by Xu Jinbo. *Bioinformatics* 37 (10): 1482–84. <https://doi.org/10.1093/bioinformatics/btaa846> (<https://doi.org/10.1093/bioinformatics/btaa846>).
- Fischer, Antje HL, Thorsten Henrich, and Detlev Arendt. 2010. "The Normal Development of Platynereis Dumerilii (Nereididae, Annelida)." *Frontiers in Zoology* 7 (1): 31. <https://doi.org/10.1186/1742-9994-7-31> (<https://doi.org/10.1186/1742-9994-7-31>).
- Forward, RB, CA Wellins, and CU Buswell. 1989. "Behavioral Responses of Larvae of the Crab Neopanope Sayi to Hydrostatic Pressure." *Marine Ecology Progress Series* 57: 267–77. <https://doi.org/10.3354/meps057267> (<https://doi.org/10.3354/meps057267>).
- Fraser, Peter J., and Alister G. Macdonald. 1994. "Crab Hydrostatic Pressure Sensors." *Nature* 371 (6496): 383–84. <https://doi.org/10.1038/371383b0> (<https://doi.org/10.1038/371383b0>).
- Fraser, Peter J, and Richard L Sheldermine. 2002. "Dogfish Hair Cells Sense Hydrostatic Pressure." *Nature* 415 (6871): 495–96. <https://doi.org/10.1038/415495a> (<https://doi.org/10.1038/415495a>).
- Gambi, Maria Cristina, Maurizio Lorenti, Giovanni F. Russo, Maria Beatrice Scipione, and Valerio Zupo. 1992. "Depth and Seasonal Distribution of Some Groups of the Vagile Fauna of the Posidonia Oceanica Leaf Stratum: Structural and Trophic Analyses." *Marine Ecology* 13 (1): 17–39. <https://doi.org/10.1111/j.1439-0485.1992.tb00337.x> (<https://doi.org/10.1111/j.1439-0485.1992.tb00337.x>).
- Genin, Amatzia, Jules S. Jaffe, Ruth Reef, Claudio Richter, and Peter J. S. Franks. 2005. "Swimming Against the Flow: A Mechanism of Zooplankton Aggregation." *Science* 308 (5723): 860–62. <https://doi.org/10.1126/science.1107834> (<https://doi.org/10.1126/science.1107834>).
- Gühmann, Martin, Huiyong Jia, Nadine Randel, Csaba Verasztó, Luis A Bezares-Calderón, Nico K Michiels, Shozo Yokoyama, and Gáspár Jékely. 2015. "Spectral Tuning of Phototaxis by a Go-Opsin in the Rhabdomic Eyes of Platynereis." *Current Biology* 25 (17): 2265–71. <https://doi.org/10.1016/j.cub.2015.07.017> (<https://doi.org/10.1016/j.cub.2015.07.017>).
- Hernandez-Nicaise, Mari-Luz. 1984. "Ctenophora." In, 96–111. Springer Berlin Heidelberg. [https://doi.org/10.1007/978-3-642-51593-4\\_9](https://doi.org/10.1007/978-3-642-51593-4_9) ([https://doi.org/10.1007/978-3-642-51593-4\\_9](https://doi.org/10.1007/978-3-642-51593-4_9)).
- Iatsenko, D., P. V. E. McClintock, and A. Stefanovska. 2016. "Extraction of Instantaneous Frequencies from Ridges in Timefrequency Representations of Signals." *Signal Processing* 125 (August): 290–303. <https://doi.org/10.1016/j.sigpro.2016.01.024> (<https://doi.org/10.1016/j.sigpro.2016.01.024>).
- Iatsenko, Dmytro, Gemma Lancaster, Sam McCormack, Julian Newman, Guru Vamsi Policharla, Valentina Ticcinielli, Tomislav Stankovski, and Aneta Stefanovska. 2019. *MODA V1.01*. Zenodo. <https://doi.org/10.5281/ZENODO.3470856> (<https://doi.org/10.5281/ZENODO.3470856>).
- Imambocus, Bibi Nusreen, Fangmin Zhou, Andrey Formozov, Annika Wittich, Federico M. Tenedini, Chun Hu, Kathrin Sauter, et al. 2022. "A Neuropeptidergic Circuit Gates Selective Escape Behavior of Drosophila Larvae." *Current Biology* 32 (1): 149–163.e8. <https://doi.org/10.1016/j.cub.2021.10.069> (<https://doi.org/10.1016/j.cub.2021.10.069>).
- Jasek, Sanja, Csaba Verasztó, Emelie Brodrick, Réza Shahidi, Tom Kazimierski, Alexandra Kerbl, and Gáspár Jékely. 2022. "Desmosomal Connectomics of All Somatic Muscles in an Annelid Larva." *eLife* 11 (December). <https://doi.org/10.7554/elife.71231> (<https://doi.org/10.7554/elife.71231>).
- Jokura, Kei, Nobuo Ueda, Martin Gühmann, Luis Alfonso Yañez-Guerra, Piotr Słowiński, Kyle C. A. Wedgwood, and Gáspár Jékely. 2023. "Nitric Oxide Feedback to Ciliary Photoreceptor Cells Gates a UV Avoidance Circuit." <http://dx.doi.org/10.1101/2023.08.02.551600> (<http://dx.doi.org/10.1101/2023.08.02.551600>).

- bioRxiv preprint doi: <https://doi.org/10.1101/2023.02.28.530398>; this version posted November 7, 2023. The copyright holder for this preprint (which was not certified by peer review) is the author/funder, who has granted bioRxiv a license to display the preprint in perpetuity. It is made available under aCC-BY-NC-ND 4.0 International license.
- Knight-Jones, E W, and S Z Qasim. 1955. "Responses of Some Marine Plankton Animals to Changes in Hydrostatic Pressure." *Nature* 175 (4465): 941–42. <https://www.ncbi.nlm.nih.gov/pubmed/14383773> (<https://www.ncbi.nlm.nih.gov/pubmed/14383773>).
- Lem, J., N. V. Krasnoperova, P. D. Calvert, B. Kosaras, D. A. Cameron, M. Nicolò, C. L. Makino, and R. L. Sidman. 1999. "Morphological, Physiological, and Biochemical Changes in Rhodopsin Knockout Mice." *Proceedings of the National Academy of Sciences* 96 (2): 736–41. <https://doi.org/10.1073/pnas.96.2.736> (<https://doi.org/10.1073/pnas.96.2.736>).
- Li, Yuhui, Ondřej Kučera, Damien Cuvelier, David M. Rutkowski, Mathieu Deygas, Dipti Rai, Tonja Pavlovič, et al. 2022. "Compressive Forces Stabilise Microtubules in Living Cells." <http://dx.doi.org/10.1101/2022.02.07.479347> (<http://dx.doi.org/10.1101/2022.02.07.479347>).
- Lincoln, R. J., and I. Gilchrist. 1970. "An Observational Pressure Vessel for Studying the Behaviour of Planktonic Animals." *Marine Biology* 6 (1): 1–4. <https://doi.org/10.1007/BF00352600> (<https://doi.org/10.1007/BF00352600>).
- Liu, Chao, and Craig Montell. 2015. "Forcing Open TRP Channels: Mechanical Gating as a Unifying Activation Mechanism." *Biochemical and Biophysical Research Communications* 460 (1): 22–25. <https://doi.org/10.1016/j.bbrc.2015.02.067> (<https://doi.org/10.1016/j.bbrc.2015.02.067>).
- Luo, Na, Michael D. Conwell, Xingjuan Chen, Christine Insinna Kettenhofen, Christopher J. Westlake, Louis B. Cantor, Clark D. Wells, et al. 2014. "Primary Cilia Signaling Mediates Intraocular Pressure Sensation." *Proceedings of the National Academy of Sciences* 111 (35): 12871–76. <https://doi.org/10.1073/pnas.1323292111> (<https://doi.org/10.1073/pnas.1323292111>).
- McDONALD, K. L., and R. I. WEBB. 2011. "Freeze Substitution in 3 Hours or Less." *Journal of Microscopy* 243 (3): 227–33. <https://doi.org/10.1111/j.1365-2818.2011.03526.x> (<https://doi.org/10.1111/j.1365-2818.2011.03526.x>).
- Morgan, Elfed. 1965. "The Activity Rhythm of the Amphipod Corophium Volutator (Pallas) and Its Possible Relationship to Changes in Hydrostatic Pressure Associated with the Tides." *The Journal of Animal Ecology* 34 (3): 731. <https://doi.org/10.2307/2459> (<https://doi.org/10.2307/2459>).
- . 1984. "The Pressure-Responses of Marine Invertebrates: A Psychophysical Perspective." *Zoological Journal of the Linnean Society* 80 (2-3): 209–30. <https://doi.org/10.1111/j.1096-3642.1984.tb01974.x> (<https://doi.org/10.1111/j.1096-3642.1984.tb01974.x>).
- Nasrin, Syeda Rubaiya, Christian Ganser, Seiji Nishikawa, Arif Md. Rashedul Kabir, Kazuki Sada, Takefumi Yamashita, Mitsunori Ikeguchi, Takayuki Uchihashi, Henry Hess, and Akira Kakugo. 2021. "Deformation of Microtubules Regulates Translocation Dynamics of Kinesin." *Science Advances* 7 (42). <https://doi.org/10.1126/sciadv.abf2211> (<https://doi.org/10.1126/sciadv.abf2211>).
- Naylor, E., and Barbara G. Williams. 1984. "Phase-Responsiveness of the Circatidal Locomotor Activity Rhythm of *Hemigrapsus Edwardsi* (Hilgendorf) to Simulated High Tide." *Journal of the Marine Biological Association of the United Kingdom* 64 (1): 81–90. <https://doi.org/10.1017/s0025315400059646> (<https://doi.org/10.1017/s0025315400059646>).
- Özpolat, B. Duygu, Nadine Randel, Elizabeth A. Williams, Luis Alberto Bezares-Calderón, Gabriele Andreatta, Guillaume Balavoine, Paola Y. Bertucci, et al. 2021. "The Nereid on the Rise: Platynereis as a Model System." *EvoDevo* 12 (1). <https://doi.org/10.1186/s13227-021-00180-3> (<https://doi.org/10.1186/s13227-021-00180-3>).
- Pang, Ji-Jie, Fan Gao, and Samuel M. Wu. 2021. "Generators of Pressure-Evoked Currents in Vertebrate Outer Retinal Neurons." *Cells* 10 (6): 1288. <https://doi.org/10.3390/cells10061288> (<https://doi.org/10.3390/cells10061288>).
- Pattappa, G, J Zellner, B Johnstone, D Docheva, and P Angele. 2019. "Cells Under Pressure the Relationship Between Hydrostatic Pressure and Mesenchymal Stem Cell Chondrogenesis." *European Cells and Materials* 36 (May): 360–81. <https://doi.org/10.22203/ecm.v037a22> (<https://doi.org/10.22203/ecm.v037a22>).
- Preibisch, Stephan, Stephan Saalfeld, Johannes Schindelin, and Pavel Tomancak. 2010. "Software for Bead-Based Registration of Selective Plane Illumination Microscopy Data." *Nature Methods* 7 (6): 418–19. <https://doi.org/10.1038/nmeth0610-418> (<https://doi.org/10.1038/nmeth0610-418>).
- Qutob, Ziad. 1963. "The Swimbladder of Fishes as a Pressure Receptor." *Archives Néerlandaises de Zoologie* 15 (1): 1–67. <https://doi.org/10.1163/036551662x00015> (<https://doi.org/10.1163/036551662x00015>).
- R. Ferreira, Rita, Hajime Fukui, Renee Chow, Andrej Vilfan, and Julien Vermot. 2019. "The Cilium as a Force Sensor-Myth Versus Reality." *Journal of Cell Science* 132 (14). <https://doi.org/10.1242/jcs.213496> (<https://doi.org/10.1242/jcs.213496>).
- Randel, Nadine, Albina Asadulina, Luis A Bezares-Calderón, Csaba Verasztó, Elizabeth A Williams, Markus Conzelmann, Réza Shahidi, and Gáspár Jékely. 2014. "Neuronal Connectome of a Sensory-Motor Circuit for Visual Navigation." *eLife* 3 (May). <https://doi.org/10.7554/elife.02730> (<https://doi.org/10.7554/elife.02730>).
- Rice, A. L. 1964. "Observations on the Effects of Changes of Hydrostatic Pressure on the Behaviour of Some Marine Animals." *Journal of the Marine Biological Association of the UK* 44 (01): 163. <https://doi.org/10.1017/S0025315400024723> (<https://doi.org/10.1017/S0025315400024723>).
- Saalfeld, Stephan, Albert Cardona, Volker Hartenstein, and Pavel Tomančák. 2009. "CATMAID: Collaborative Annotation Toolkit for Massive Amounts of Image Data." *Bioinformatics* 25 (15): 1984–86. <https://doi.org/10.1093/bioinformatics/btp266> (<https://doi.org/10.1093/bioinformatics/btp266>).
- Sulkin, SD. 1984. "Behavioral Basis of Depth Regulation in the Larvae of Brachyuran Crabs." *Marine Ecology Progress Series* 15: 181–205. <https://doi.org/10.3354/meps015181> (<https://doi.org/10.3354/meps015181>).
- Sweeney, Sean T, Kendal Broadie, John Keane, Heiner Niemann, and Cahir J O'Kane. 1995. "Targeted Expression of Tetanus Toxin Light Chain in *Drosophila* Specifically Eliminates Synaptic Transmission and Causes Behavioral Defects." *Neuron* 14 (2): 341–51. [https://doi.org/10.1016/0896-6273\(95\)90290-2](https://doi.org/10.1016/0896-6273(95)90290-2) ([https://doi.org/10.1016/0896-6273\(95\)90290-2](https://doi.org/10.1016/0896-6273(95)90290-2)).
- Tessmar-Raible, Kristin, Florian Raible, Foteini Christodoulou, Keren Guy, Martina Rembold, Harald Hausen, and Detlev Arendt. 2007. "Conserved Sensory-Neurosecretory Cell Types in Annelid and Fish Forebrain: Insights into Hypothalamus Evolution." *Cell* 129 (7): 1389–1400. <https://doi.org/10.1016/j.cell.2007.04.041> (<https://doi.org/10.1016/j.cell.2007.04.041>).
- Tosches, Maria Antonietta, Daniel Bucher, Pavel Vopalensky, and Detlev Arendt. 2014. "Melatonin Signaling Controls Circadian Swimming Behavior in Marine Zooplankton." *Cell* 159 (1): 46–57. <https://doi.org/10.1016/j.cell.2014.07.042> (<https://doi.org/10.1016/j.cell.2014.07.042>).
- Tsukamoto, Hisao, I-Shan Chen, Yoshihiro Kubo, and Yuji Furutani. 2017. "A Ciliary Opsin in the Brain of a Marine Annelid Zooplankton Is Ultraviolet-Sensitive, and the Sensitivity Is Tuned by a Single Amino Acid Residue." *Journal of Biological Chemistry* 292 (31): 12971–80. <https://doi.org/10.1074/jbc.m117.793539> (<https://doi.org/10.1074/jbc.m117.793539>).
- Verasztó, Csaba, Martin Gühmann, Huiyong Jia, Vinoth Babu Veedin Rajan, Luis A Bezares-Calderón, Cristina Piñeiro-Lopez, Nadine Randel, et al. 2018. "Ciliary and Rhabdomeric Photoreceptor-Cell Circuits Form a Spectral Depth Gauge in Marine Zooplankton." *eLife* 7 (May). <https://doi.org/10.7554/elife.36440> (<https://doi.org/10.7554/elife.36440>).
- Verasztó, Csaba, Sanja Jasek, Martin Gühmann, Réza Shahidi, Nobuo Ueda, James David Beard, Sara Mendes, et al. 2020. "Whole-Animal Connectome and Cell-Type Complement of the Three-Segmented *Platynereis Dumerilii* Larva." <http://dx.doi.org/10.1101/2020.08.21.260984> (<http://dx.doi.org/10.1101/2020.08.21.260984>).
- Verasztó, Csaba, Nobuo Ueda, Luis A Bezares-Calderón, Aurora Panzera, Elizabeth A Williams, Réza Shahidi, and Gáspár Jékely. 2017. "Ciliomotor Circuitry Underlying Whole-Body Coordination of Ciliary Activity in the *Platynereis* Larva." *eLife* 6 (May). <https://doi.org/10.7554/elife.26000> (<https://doi.org/10.7554/elife.26000>).
- Williams, Elizabeth A, Csaba Verasztó, Sanja Jasek, Markus Conzelmann, Réza Shahidi, Philipp Bauknecht, Olivier Mirabeau, and Gáspár Jékely. 2017. "Synaptic and Peptidergic Connectome of a Neurosecretory Center in the Annelid Brain." *eLife* 6 (December). <https://doi.org/10.7554/elife.26349> (<https://doi.org/10.7554/elife.26349>).
- Zanini, Damiano, Diego Giraldo, Ben Warren, Radosław Katana, Marta Andrés, Suneel Reddy, Stephanie Pauls, Nicola Schwedhelm-Domeyer, Bart R. H. Geurten, and Martin C. Göpfert. 2018. "Proprioceptive Opsin Functions in *Drosophila* Larval Locomotion." *Neuron* 98 (1): 67–74.e4. <https://doi.org/10.1016/j.neuron.2018.02.028> (<https://doi.org/10.1016/j.neuron.2018.02.028>).
